# Supplementary material for: Assessment of Nutrient and Food Group Intakes across Sex, Physical Activity, and Body Mass Index in an Urban Brazilian Population
Source: PubMed Central journal article supplement (PMC6265884; doi:10.3390/nu10111714), 2018-11-09
Supplement: nutrients-10-01714-s001.pdf [file nutrients-10-01714-s001.pdf]

Supplementary Materials

Table S1. Distribution of mean and percentiles of usual intake, prevalence of inadequate intake, and percentage of individuals above UL value by gender and age. Brazil, 2016-2017

| Age (years)             | N   | EAR/AI <sup>1</sup> | UL <sup>2</sup>  | Mean   | SD <sup>3</sup> | P5     | SE <sup>4</sup> | P10    | SE    | P25    | SE   | P50    | SE   | P75    | SE    | P90    | SE    | P95    | SE    | Prevalence of inadequacy (%) | Above UL (%) |
|-------------------------|-----|---------------------|------------------|--------|-----------------|--------|-----------------|--------|-------|--------|------|--------|------|--------|-------|--------|-------|--------|-------|------------------------------|--------------|
| <b>Calcium (mg)</b>     |     |                     |                  |        |                 |        |                 |        |       |        |      |        |      |        |       |        |       |        |       |                              |              |
| <b>Male</b>             |     |                     |                  |        |                 |        |                 |        |       |        |      |        |      |        |       |        |       |        |       |                              |              |
| 20-30                   | 76  | 800                 | 2500             | 1543.0 | 374.8           | 996.0  | 107.0           | 1094.0 | 96.7  | 1276.0 | 78.7 | 1506.0 | 72.4 | 1770.0 | 104.0 | 2039.0 | 162.0 | 2215.0 | 207.0 | 0.7                          | 1.4          |
| 31-50                   | 84  | 800                 | 2500             | 1476.7 | 414.8           | 879.0  | 97.5            | 984.0  | 88.1  | 1180.0 | 71.8 | 1432.0 | 66.1 | 1725.0 | 97.3  | 2027.0 | 155.0 | 2226.0 | 200.0 | 2.6                          | 1.7          |
| 50+                     | 56  | 800                 | 2000             | 1479.7 | 402.4           | 860.0  | 144.0           | 980.0  | 126.0 | 1196.0 | 96.4 | 1456.0 | 82.5 | 1738.0 | 114.0 | 2010.0 | 171.0 | 2180.0 | 212.0 | 3.3                          | 10.4         |
| <b>Female</b>           |     |                     |                  |        |                 |        |                 |        |       |        |      |        |      |        |       |        |       |        |       |                              |              |
| 20-30                   | 111 | 800                 | 2500             | 1197.9 | 326.5           | 702.0  | 76.7            | 795.0  | 68.5  | 966.0  | 54.3 | 1175.0 | 47.7 | 1405.0 | 65.2  | 1629.0 | 98.1  | 1771.0 | 123.0 | 10.3                         | 0.1          |
| 31-50                   | 91  | 800                 | 2500             | 1174.6 | 245.7           | 810.0  | 80.2            | 878.0  | 71.9  | 1000.0 | 58.0 | 1153.0 | 52.6 | 1326.0 | 73.3  | 1499.0 | 113.0 | 1611.0 | 143.0 | 4.4                          | 0.0          |
| 50+                     | 88  | 1000                | 2000             | 1142.6 | 308.3           | 695.0  | 66.4            | 774.0  | 60.1  | 922.0  | 48.5 | 1111.0 | 43.5 | 1329.0 | 63.9  | 1550.0 | 102.0 | 1696.0 | 132.0 | 34.9                         | 1.0          |
| <b>All</b>              | 506 | -                   | -                | 1317.0 | 401.6           | 745.0  | 35.9            | 843.0  | 32.8  | 1029.0 | 27.3 | 1271.0 | 25.5 | 1555.0 | 37.6  | 1850.0 | 60.2  | 2046.0 | 77.9  | -                            | -            |
| <b>Phosphorous (mg)</b> |     |                     |                  |        |                 |        |                 |        |       |        |      |        |      |        |       |        |       |        |       |                              |              |
| <b>Male</b>             |     |                     |                  |        |                 |        |                 |        |       |        |      |        |      |        |       |        |       |        |       |                              |              |
| 20-30                   | 76  | 580                 | 4000             | 1791.5 | 443.6           | 1108.0 | 135.0           | 1241.0 | 119.0 | 1479.0 | 92.6 | 1766.0 | 79.9 | 2076.0 | 108.0 | 2375.0 | 161.0 | 2562.0 | 200.0 | 0.0                          | 0.0          |
| 31-50                   | 84  | 580                 | 4000             | 1611.7 | 543.9           | 876.0  | 99.8            | 993.0  | 92.5  | 1222.0 | 78.4 | 1532.0 | 75.5 | 1915.0 | 119.0 | 2332.0 | 203.0 | 2619.0 | 271.0 | 0.3                          | 0.1          |
| 50+                     | 56  | 580                 | 4000             | 1561.7 | 470.5           | 915.0  | 123.0           | 1021.0 | 113.0 | 1225.0 | 95.0 | 1498.0 | 90.5 | 1828.0 | 140.0 | 2184.0 | 234.0 | 2427.0 | 310.0 | 0.1                          | 0.0          |
| <b>Female</b>           |     |                     |                  |        |                 |        |                 |        |       |        |      |        |      |        |       |        |       |        |       |                              |              |
| 20-30                   | 111 | 580                 | 4000             | 1141.1 | 125.8           | 940.0  | 67.7            | 982.0  | 58.2  | 1054.0 | 44.0 | 1138.0 | 37.1 | 1224.0 | 47.2  | 1304.0 | 67.0  | 1354.0 | 81.5  | 0.0                          | 0.0          |
| 31-50                   | 91  | 580                 | 4000             | 1082.9 | 215.6           | 756.0  | 75.6            | 819.0  | 66.7  | 931.0  | 52.7 | 1068.0 | 47.0 | 1219.0 | 64.2  | 1367.0 | 96.2  | 1461.0 | 120.0 | 0.3                          | 0.0          |
| 50+                     | 88  | 580                 | 4000             | 1093.2 | 259.3           | 725.0  | 58.1            | 789.0  | 52.6  | 908.0  | 43.1 | 1063.0 | 40.0 | 1245.0 | 59.4  | 1435.0 | 96.5  | 1563.0 | 126.0 | 0.5                          | 0.0          |
| <b>All</b>              | 506 | -                   | -                | 1347.9 | 440.4           | 749.0  | 34.2            | 845.0  | 31.8  | 1033.0 | 27.2 | 1285.0 | 26.4 | 1594.0 | 40.8  | 1930.0 | 68.3  | 2160.0 | 91.0  | -                            | -            |
| <b>Magnesium (mg)</b>   |     |                     |                  |        |                 |        |                 |        |       |        |      |        |      |        |       |        |       |        |       |                              |              |
| <b>Male</b>             |     |                     |                  |        |                 |        |                 |        |       |        |      |        |      |        |       |        |       |        |       |                              |              |
| 20-30                   | 76  | 330                 | 350 <sup>†</sup> | 607.3  | 151.8           | 391.0  | 35.8            | 429.0  | 32.4  | 499.0  | 26.5 | 590.0  | 24.6 | 697.0  | 36.5  | 808.0  | 59.0  | 882.0  | 76.9  | 1.0                          | -            |
| 31-50                   | 84  | 350                 | 350 <sup>†</sup> | 550.8  | 134.3           | 365.0  | 27.8            | 396.0  | 25.3  | 455.0  | 20.9 | 533.0  | 19.7 | 627.0  | 30.4  | 728.0  | 50.8  | 797.0  | 67.5  | 3.3                          | -            |
| 50+                     | 56  | 350                 | 350 <sup>†</sup> | 555.1  | 145.0           | 336.0  | 45.1            | 377.0  | 39.4  | 452.0  | 30.1 | 545.0  | 25.8 | 647.0  | 37.0  | 747.0  | 57.2  | 810.0  | 71.9  | 6.5                          | -            |
| <b>Female</b>           |     |                     |                  |        |                 |        |                 |        |       |        |      |        |      |        |       |        |       |        |       |                              |              |
| 20-30                   | 111 | 255                 | 350 <sup>†</sup> | 441.6  | 71.5            | 326.0  | 25.5            | 351.0  | 21.8  | 393.0  | 16.2 | 441.0  | 13.3 | 489.0  | 16.8  | 534.0  | 23.5  | 561.0  | 28.4  | 0.3                          | -            |
| 31-50                   | 91  | 265                 | 350 <sup>†</sup> | 455.2  | 111.5           | 287.0  | 28.8            | 319.0  | 25.5  | 376.0  | 20.1 | 447.0  | 17.8 | 525.0  | 24.7  | 602.0  | 37.8  | 652.0  | 47.6  | 2.8                          | -            |
| 50+                     | 88  | 265                 | 350 <sup>†</sup> | 432.2  | 91.3            | 285.0  | 28.0            | 316.0  | 23.9  | 369.0  | 17.5 | 430.0  | 14.2 | 493.0  | 18.4  | 550.0  | 26.5  | 585.0  | 32.3  | 2.9                          | -            |
| <b>All</b>              | 506 | -                   | -                | 498.2  | 136.5           | 300.0  | 12.2            | 335.0  | 11.0  | 401.0  | 9.0  | 484.0  | 8.2  | 580.0  | 11.9  | 679.0  | 19.0  | 744.0  | 24.4  | -                            | -            |

Table S1. Continued.

| Age (years)           | N          | EAR/AI <sup>1</sup> | UL <sup>2</sup> | Mean          | SD <sup>3</sup> | P5           | SE <sup>4</sup> | P10          | SE          | P25          | SE          | P50           | SE          | P75           | SE          | P90           | SE           | P95           | SE           | Prevalence of inadequacy (%) | Above UL (%) |
|-----------------------|------------|---------------------|-----------------|---------------|-----------------|--------------|-----------------|--------------|-------------|--------------|-------------|---------------|-------------|---------------|-------------|---------------|--------------|---------------|--------------|------------------------------|--------------|
| <b>Zinc (mg)</b>      |            |                     |                 |               |                 |              |                 |              |             |              |             |               |             |               |             |               |              |               |              |                              |              |
| <b>Male</b>           |            |                     |                 |               |                 |              |                 |              |             |              |             |               |             |               |             |               |              |               |              |                              |              |
| 20-30                 | 76         | 9.4                 | 40              | 17.8          | 2.6             | 13.8         | 1.7             | 14.6         | 1.5         | 16.0         | 1.2         | 17.6          | 1.0         | 19.5          | 1.4         | 21.2          | 2.0          | 22.3          | 2.5          | 0.0                          | 0.0          |
| 31-50                 | 84         | 9.4                 | 40              | 15.6          | 7.9             | 6.7          | 0.9             | 7.8          | 0.9         | 10.1         | 0.8         | 13.7          | 0.9         | 18.9          | 1.7         | 25.5          | 3.3          | 30.6          | 4.9          | 20.0                         | 1.5          |
| 50+                   | 56         | 9.4                 | 40              | 13.7          | 4.4             | 7.8          | 1.1             | 8.7          | 1.0         | 10.6         | 0.9         | 13.1          | 0.8         | 16.1          | 1.3         | 19.5          | 2.2          | 21.8          | 3.0          | 14.8                         | 0.0          |
| <b>Female</b>         |            |                     |                 |               |                 |              |                 |              |             |              |             |               |             |               |             |               |              |               |              |                              |              |
| 20-30                 | 111        | 6.8                 | 40              | 10.2          | 2.1             | 7.1          | 0.6             | 7.7          | 0.6         | 8.7          | 0.5         | 10.0          | 0.4         | 11.4          | 0.6         | 12.9          | 0.9          | 13.9          | 1.2          | 3.0                          | 0.0          |
| 31-50                 | 91         | 6.8                 | 40              | 10.0          | 3.2             | 5.4          | 0.7             | 6.2          | 0.6         | 7.6          | 0.5         | 9.5           | 0.5         | 11.8          | 0.8         | 14.3          | 1.3          | 15.9          | 1.7          | 15.7                         | 0.0          |
| 50+                   | 88         | 6.8                 | 40              | 9.3           | 1.0             | 7.7          | 0.7             | 8.0          | 0.6         | 8.5          | 0.5         | 9.2           | 0.4         | 9.9           | 0.6         | 10.6          | 0.9          | 11.1          | 1.1          | 0.3                          | 0.0          |
| <b>All</b>            | <b>506</b> | <b>-</b>            | <b>-</b>        | <b>12.5</b>   | <b>4.9</b>      | <b>6.3</b>   | <b>0.3</b>      | <b>7.2</b>   | <b>0.3</b>  | <b>9.0</b>   | <b>0.3</b>  | <b>11.6</b>   | <b>0.3</b>  | <b>14.9</b>   | <b>0.5</b>  | <b>18.8</b>   | <b>0.9</b>   | <b>21.6</b>   | <b>1.2</b>   | <b>-</b>                     | <b>-</b>     |
| <b>Copper (mg)</b>    |            |                     |                 |               |                 |              |                 |              |             |              |             |               |             |               |             |               |              |               |              |                              |              |
| <b>Male</b>           |            |                     |                 |               |                 |              |                 |              |             |              |             |               |             |               |             |               |              |               |              |                              |              |
| 20-30                 | 76         | 700                 | 10000           | 1423.6        | 404.1           | 830.0        | 106.0           | 937.0        | 95.5        | 1135.0       | 77.2        | 1386.0        | 70.1        | 1671.0        | 100.0       | 1959.0        | 156.0        | 2147.0        | 199.0        | 1.7                          | 0.0          |
| 31-50                 | 84         | 700                 | 10000           | 1504.4        | 502.5           | 826.0        | 105.0           | 934.0        | 98.0        | 1145.0       | 84.5        | 1431.0        | 82.9        | 1783.0        | 129.0       | 2168.0        | 216.0        | 2434.0        | 289.0        | 1.7                          | 0.0          |
| 50+                   | 56         | 700                 | 10000           | 1574.5        | 677.7           | 880.0        | 110.0           | 975.0        | 101.0       | 1153.0       | 85.0        | 1410.0        | 91.3        | 1796.0        | 182.0       | 2348.0        | 414.0        | 2819.0        | 655.0        | 0.8                          | 0.0          |
| <b>Female</b>         |            |                     |                 |               |                 |              |                 |              |             |              |             |               |             |               |             |               |              |               |              |                              |              |
| 20-30                 | 111        | 700                 | 10000           | 1197.1        | 282.7           | 895.0        | 68.0            | 933.0        | 66.8        | 1011.0       | 64.7        | 1132.0        | 73.5        | 1303.0        | 132.0       | 1532.0        | 273.0        | 1719.0        | 405.0        | 0.0                          | 0.0          |
| 31-50                 | 91         | 700                 | 10000           | 1123.1        | 369.4           | 623.0        | 72.8            | 703.0        | 67.9        | 859.0        | 58.6        | 1069.0        | 57.4        | 1328.0        | 88.6        | 1611.0        | 148.0        | 1806.0        | 198.0        | 9.8                          | 0.0          |
| 50+                   | 88         | 700                 | 10000           | 1084.6        | 214.5           | 772.0        | 77.5            | 828.0        | 69.6        | 932.0        | 56.5        | 1064.0        | 51.9        | 1214.0        | 74.0        | 1368.0        | 116.0        | 1469.0        | 149.0        | 1.6                          | 0.0          |
| <b>All</b>            | <b>506</b> | <b>-</b>            | <b>-</b>        | <b>1330.4</b> | <b>579.5</b>    | <b>751.0</b> | <b>35.0</b>     | <b>834.0</b> | <b>31.7</b> | <b>990.0</b> | <b>26.6</b> | <b>1206.0</b> | <b>28.6</b> | <b>1510.0</b> | <b>52.5</b> | <b>1924.0</b> | <b>110.0</b> | <b>2288.0</b> | <b>186.0</b> | <b>-</b>                     | <b>-</b>     |
| <b>Selenium (mcg)</b> |            |                     |                 |               |                 |              |                 |              |             |              |             |               |             |               |             |               |              |               |              |                              |              |
| <b>Male</b>           |            |                     |                 |               |                 |              |                 |              |             |              |             |               |             |               |             |               |              |               |              |                              |              |
| 20-30                 | 76         | 45                  | 400             | 190.9         | 55.0            | 118.0        | 14.5            | 130.0        | 13.2        | 153.0        | 10.9        | 182.0         | 10.6        | 220.0         | 16.7        | 262.0         | 29.6         | 292.0         | 40.7         | 0.0                          | 0.4          |
| 31-50                 | 84         | 45                  | 400             | 176.9         | 85.0            | 74           | 11.5            | 88.0         | 11.3        | 117.0        | 10.4        | 160.0         | 11.0        | 218.0         | 19.0        | 286.0         | 35.3         | 337.0         | 49.9         | 0.3                          | 2.1          |
| 50+                   | 56         | 45                  | 400             | 156.1         | 65.5            | 84.0         | 10.2            | 92.0         | 9.9         | 111.0        | 9.3         | 141.0         | 10.6        | 184.0         | 19.9        | 238.0         | 39.4         | 281.0         | 57.8         | 0.0                          | 0.8          |
| <b>Female</b>         |            |                     |                 |               |                 |              |                 |              |             |              |             |               |             |               |             |               |              |               |              |                              |              |
| 20-30                 | 111        | 45                  | 400             | 121.1         | 2.3             | 117.3        | 11.8            | 118.2        | 10.0        | 119.5        | 7.4         | 121.1         | 6.2         | 122.7         | 7.7         | 124.2         | 10.6         | 125.0         | 12.6         | 0.0                          | 0.0          |
| 31-50                 | 91         | 45                  | 400             | 113.1         | 33.9            | 67.0         | 8.8             | 75.0         | 7.9         | 90.0         | 6.4         | 108.0         | 6.1         | 131.0         | 9.6         | 157.0         | 16.9         | 175.0         | 23.1         | 0.2                          | 0.0          |
| 50+                   | 88         | 45                  | 400             | 111.0         | 49.2            | 62.0         | 5.8             | 69.0         | 5.4         | 81.0         | 4.7         | 99.0          | 5.2         | 126.0         | 10.5        | 166.0         | 24.1         | 201.0         | 38.5         | 0.3                          | 0.3          |
| <b>All</b>            | <b>506</b> | <b>-</b>            | <b>-</b>        | <b>141.9</b>  | <b>58.4</b>     | <b>73.0</b>  | <b>4.0</b>      | <b>83.0</b>  | <b>3.6</b>  | <b>102.0</b> | <b>3.2</b>  | <b>130.0</b>  | <b>3.4</b>  | <b>168.0</b>  | <b>6.1</b>  | <b>216.0</b>  | <b>11.4</b>  | <b>252.0</b>  | <b>16.4</b>  | <b>-</b>                     | <b>-</b>     |

**Table S1. Continued.**

| Age (years)           | N   | EAR/AI <sup>1</sup> | UL <sup>2</sup> | Mean | SD <sup>3</sup> | P5   | SE <sup>4</sup> | P10  | SE  | P25  | SE  | P50  | SE  | P75  | SE  | P90  | SE  | P95  | SE  | Prevalence of inadequacy (%) | Above UL (%) |
|-----------------------|-----|---------------------|-----------------|------|-----------------|------|-----------------|------|-----|------|-----|------|-----|------|-----|------|-----|------|-----|------------------------------|--------------|
| <b>Iron (mg)</b>      |     |                     |                 |      |                 |      |                 |      |     |      |     |      |     |      |     |      |     |      |     |                              |              |
| <b>Male</b>           |     |                     |                 |      |                 |      |                 |      |     |      |     |      |     |      |     |      |     |      |     |                              |              |
| 20-30                 | 76  | 6                   | 45              | 16.6 | 3.3             | 11.6 | 1.2             | 12.5 | 1.1 | 14.2 | 0.9 | 16.3 | 0.8 | 18.6 | 1.1 | 20.9 | 1.7 | 22.4 | 2.1 | 0.0                          | 0.0          |
| 31-50                 | 84  | 6                   | 45              | 15.5 | 5.2             | 8.7  | 0.9             | 9.7  | 0.8 | 11.8 | 0.7 | 14.7 | 0.7 | 18.3 | 1.1 | 22.3 | 2.0 | 25.2 | 2.7 | 0.3                          | 0.0          |
| 50+                   | 56  | 6                   | 45              | 14.7 | 3.8             | 9.8  | 0.9             | 10.5 | 0.8 | 12.0 | 0.7 | 14.0 | 0.7 | 16.7 | 1.1 | 19.7 | 2.0 | 21.8 | 2.8 | 0.0                          | 0.0          |
| <b>Female</b>         |     |                     |                 |      |                 |      |                 |      |     |      |     |      |     |      |     |      |     |      |     |                              |              |
| 20-50                 | 202 | 8.1*                | 45              | 11.6 | 1.6             | 8.6  | -               | 9.6  | -   | 10.8 | -   | 11.7 | -   | 12.4 | -   | 13.3 | -   | 14.1 | -   | 11.4                         | 0.0          |
| 50+                   | 88  | 5*                  | 45              | 10.7 | 0.9             | 9.1  | -               | 9.5  | -   | 10.1 | -   | 11.3 | -   | 12.1 | -   | 12.4 | -   | 13.5 | -   | 0.0                          | 0.0          |
| <b>All</b>            | 506 | -                   | -               | 13.2 | 3.8             | 8.1  | 0.3             | 9.0  | 0.3 | 10.6 | 0.2 | 12.7 | 0.2 | 15.3 | 0.4 | 18.2 | 0.6 | 20.2 | 0.9 | -                            | -            |
| <b>Sodium (g)</b>     |     |                     |                 |      |                 |      |                 |      |     |      |     |      |     |      |     |      |     |      |     |                              |              |
| <b>Male</b>           |     |                     |                 |      |                 |      |                 |      |     |      |     |      |     |      |     |      |     |      |     |                              |              |
| 20-30                 | 76  | 1.5 <sup>b</sup>    | 2.3             | 4.4  | 0.8             | 3.2  | 0.3             | 3.4  | 0.3 | 3.8  | 0.2 | 4.3  | 0.2 | 4.9  | 0.3 | 5.4  | 0.4 | 5.7  | 0.5 | -                            | 99.9         |
| 31-50                 | 84  | 1.5 <sup>b</sup>    | 2.3             | 4.1  | 1.3             | 2.4  | 0.2             | 2.7  | 0.2 | 3.1  | 0.2 | 3.8  | 0.2 | 4.7  | 0.3 | 5.7  | 0.6 | 6.5  | 0.8 | -                            | 96.5         |
| 50+                   | 56  | 1.3 <sup>b</sup>    | 2.3             | 3.7  | 1.0             | 2.3  | 0.3             | 2.5  | 0.2 | 3.0  | 0.2 | 3.5  | 0.2 | 4.3  | 0.3 | 5.1  | 0.6 | 5.7  | 0.8 | -                            | 95.3         |
| <b>Female</b>         |     |                     |                 |      |                 |      |                 |      |     |      |     |      |     |      |     |      |     |      |     |                              |              |
| 20-30                 | 111 | 1.5 <sup>b</sup>    | 2.3             | 3.0  | 0.5             | 2.2  | 0.2             | 2.4  | 0.2 | 2.7  | 0.1 | 3.0  | 0.1 | 3.4  | 0.2 | 3.7  | 0.2 | 4.0  | 0.3 | -                            | 92.1         |
| 31-50                 | 91  | 1.5 <sup>b</sup>    | 2.3             | 2.8  | 0.6             | 2.0  | 0.2             | 2.1  | 0.2 | 2.4  | 0.1 | 2.8  | 0.1 | 3.2  | 0.2 | 3.6  | 0.3 | 3.9  | 0.4 | -                            | 81.1         |
| 50+                   | 88  | 1.3 <sup>b</sup>    | 2.3             | 2.7  | 0.6             | 1.8  | 0.2             | 1.9  | 0.1 | 2.2  | 0.1 | 2.6  | 0.1 | 3.1  | 0.2 | 3.5  | 0.3 | 3.8  | 0.3 | -                            | 70.4         |
| <b>All</b>            | 506 | -                   | -               | 3.4  | 1.0             | 1.9  | 0.1             | 2.2  | 0.1 | 2.6  | 0.1 | 3.2  | 0.1 | 4.0  | 0.1 | 4.8  | 0.2 | 5.3  | 0.2 | -                            | -            |
| <b>Potassium (mg)</b> |     |                     |                 |      |                 |      |                 |      |     |      |     |      |     |      |     |      |     |      |     |                              |              |
| <b>Male</b>           |     |                     |                 |      |                 |      |                 |      |     |      |     |      |     |      |     |      |     |      |     |                              |              |
| 20-30                 | 76  | 4.7 <sup>b</sup>    | -               | 3.4  | 0.8             | 2.2  | 0.3             | 2.4  | 0.2 | 2.9  | 0.2 | 3.4  | 0.2 | 3.9  | 0.2 | 4.5  | 0.3 | 4.8  | 0.4 | -                            | -            |
| 31-50                 | 84  | 4.7 <sup>b</sup>    | -               | 3.2  | 0.8             | 2.0  | 0.2             | 2.2  | 0.2 | 2.6  | 0.1 | 3.1  | 0.1 | 3.7  | 0.2 | 4.3  | 0.3 | 4.6  | 0.4 | -                            | -            |
| 50+                   | 56  | 4.7 <sup>b</sup>    | -               | 3.5  | 0.8             | 2.3  | 0.3             | 2.5  | 0.3 | 2.9  | 0.2 | 3.4  | 0.2 | 4.0  | 0.3 | 4.6  | 0.4 | 5.0  | 0.5 | -                            | -            |
| <b>Female</b>         |     |                     |                 |      |                 |      |                 |      |     |      |     |      |     |      |     |      |     |      |     |                              |              |
| 20-30                 | 111 | 4.7 <sup>b</sup>    | -               | 2.3  | 0.4             | 1.7  | 0.1             | 1.8  | 0.1 | 2.1  | 0.1 | 2.3  | 0.1 | 2.6  | 0.1 | 2.9  | 0.2 | 3.0  | 0.2 | -                            | -            |
| 31-50                 | 91  | 4.7 <sup>b</sup>    | -               | 2.4  | 0.7             | 1.4  | 0.2             | 1.6  | 0.1 | 1.9  | 0.1 | 2.4  | 0.1 | 2.8  | 0.2 | 3.3  | 0.2 | 3.7  | 0.3 | -                            | -            |
| 50+                   | 88  | 4.7 <sup>b</sup>    | -               | 2.5  | 0.5             | 1.7  | 0.1             | 1.9  | 0.1 | 2.1  | 0.1 | 2.5  | 0.1 | 2.9  | 0.1 | 3.3  | 0.2 | 3.5  | 0.3 | -                            | -            |
| <b>All</b>            | 506 | -                   | -               | 2.8  | 0.8             | 1.7  | 0.1             | 1.9  | 0.1 | 2.2  | 0.1 | 2.7  | 0.1 | 3.3  | 0.1 | 3.9  | 0.1 | 4.3  | 0.2 | -                            | -            |

**Table S1. Continued.**

| Age (years)            | N          | EAR/AI <sup>1</sup> | UL <sup>2</sup> | Mean          | SD <sup>3</sup> | P5           | SE <sup>4</sup> | P10          | SE          | P25          | SE          | P50           | SE          | P75           | SE          | P90           | SE           | P95           | SE           | Prevalence of inadequacy (%) | Above UL (%) |
|------------------------|------------|---------------------|-----------------|---------------|-----------------|--------------|-----------------|--------------|-------------|--------------|-------------|---------------|-------------|---------------|-------------|---------------|--------------|---------------|--------------|------------------------------|--------------|
| <b>Manganese (mg)</b>  |            |                     |                 |               |                 |              |                 |              |             |              |             |               |             |               |             |               |              |               |              |                              |              |
| <b>Male</b>            |            |                     |                 |               |                 |              |                 |              |             |              |             |               |             |               |             |               |              |               |              |                              |              |
| 20-30                  | 76         | 2.3 <sup>b</sup>    | 11              | 8.9           | 11.5            | 2.5          | 0.4             | 2.9          | 0.5         | 3.8          | 0.5         | 5.6           | 0.9         | 9.5           | 2.4         | 17.1          | 6.8          | 25.1          | 12.7         | -                            | 20.3         |
| 31-50                  | 84         | 2.3 <sup>b</sup>    | 11              | 49.3          | 366.5           | 1.9          | 0.3             | 2.2          | 0.3         | 3.1          | 0.4         | 5.5           | 1.1         | 15.7          | 6.2         | 58.5          | 38.1         | 138.5         | 113.0        | -                            | 31.5         |
| 50+                    | 56         | 2.3 <sup>b</sup>    | 11              | 18.8          | 78.0            | 2.3          | 0.4             | 2.6          | 0.3         | 3.4          | 0.4         | 5.3           | 1.0         | 11.5          | 4.4         | 31.3          | 20.2         | 61.4          | 51.0         | -                            | 26.1         |
| <b>Female</b>          |            |                     |                 |               |                 |              |                 |              |             |              |             |               |             |               |             |               |              |               |              |                              |              |
| 20-30                  | 111        | 1.8 <sup>b</sup>    | 11              | 15.2          | 79.0            | 2.0          | 0.2             | 2.2          | 0.2         | 2.6          | 0.2         | 3.8           | 0.5         | 7.9           | 2.3         | 22.0          | 12.1         | 45.5          | 32.9         | -                            | 18.6         |
| 31-50                  | 91         | 1.8 <sup>b</sup>    | 11              | 5.4           | 13.8            | 1.5          | 0.2             | 1.7          | 0.2         | 2.2          | 0.2         | 3.0           | 0.2         | 4.5           | 0.7         | 8.5           | 3.0          | 14.3          | 7.0          | -                            | 7.1          |
| 50+                    | 88         | 1.8 <sup>b</sup>    | 11              | 7.1           | 11.5            | 2.5          | 0.3             | 2.7          | 0.3         | 3.1          | 0.4         | 4.2           | 0.7         | 6.9           | 2.4         | 12.9          | 8.0          | 20.0          | 16.3         | -                            | 12.7         |
| <b>All</b>             | <b>506</b> | <b>-</b>            | <b>-</b>        | <b>10.5</b>   | <b>14.5</b>     | <b>1.9</b>   | <b>0.1</b>      | <b>2.2</b>   | <b>0.1</b>  | <b>2.8</b>   | <b>0.1</b>  | <b>4.2</b>    | <b>0.3</b>  | <b>12.1</b>   | <b>2.1</b>  | <b>28.8</b>   | <b>3.2</b>   | <b>37.9</b>   | <b>4.2</b>   | <b>-</b>                     | <b>-</b>     |
| <b>Vitamin A (mcg)</b> |            |                     |                 |               |                 |              |                 |              |             |              |             |               |             |               |             |               |              |               |              |                              |              |
| <b>Male</b>            |            |                     |                 |               |                 |              |                 |              |             |              |             |               |             |               |             |               |              |               |              |                              |              |
| 20-30                  | 76         | 625                 | 3000            | 1202.7        | 604.9           | 463.0        | 112.0           | 563.0        | 112.0       | 772.0        | 107.0       | 1083.0        | 116.0       | 1500.0        | 192.0       | 1991.0        | 342.0        | 2349.0        | 474.0        | 14.0                         | 1.4          |
| 31-50                  | 84         | 625                 | 3000            | 1066.5        | 267.4           | 693.0        | 108.0           | 757.0        | 97.8        | 878.0        | 80.8        | 1034.0        | 76.2        | 1218.0        | 113.0       | 1416.0        | 188.0        | 1552.0        | 252.0        | 1.9                          | 0.0          |
| 50+                    | 56         | 625                 | 3000            | 1796.0        | 844.3           | 880.0        | 156.0           | 986.0        | 153.0       | 1219.0       | 148.0       | 1593.0        | 173.0       | 2140.0        | 325.0       | 2846.0        | 650.0        | 3398.0        | 961.0        | 0.2                          | 8.2          |
| <b>Female</b>          |            |                     |                 |               |                 |              |                 |              |             |              |             |               |             |               |             |               |              |               |              |                              |              |
| 20-30                  | 111        | 500                 | 3000            | 1110.6        | 548.6           | 504.0        | 88.1            | 583.0        | 85.7        | 745.0        | 80.1        | 987.0         | 89.3        | 1331.0        | 160.0       | 1776.0        | 319.0        | 2131.0        | 476.0        | 4.8                          | 1.1          |
| 31-50                  | 91         | 500                 | 3000            | 1061.1        | 597.2           | 435.0        | 82.4            | 513.0        | 80.7        | 675.0        | 75.4        | 918.0         | 84.8        | 1276.0        | 158.0       | 1761.0        | 335.0        | 2162.0        | 515.0        | 9.0                          | 1.4          |
| 50+                    | 88         | 500                 | 3000            | 1186.2        | 583.7           | 501.0        | 78.2            | 590.0        | 77.0        | 779.0        | 72.6        | 1062.0        | 78.9        | 1453.0        | 138.0       | 1931.0        | 260.0        | 2290.0        | 372.0        | 4.9                          | 1.3          |
| <b>All</b>             | <b>506</b> | <b>-</b>            | <b>-</b>        | <b>1215.6</b> | <b>643.1</b>    | <b>505.0</b> | <b>41.1</b>     | <b>599.0</b> | <b>39.8</b> | <b>789.0</b> | <b>36.4</b> | <b>1070.0</b> | <b>40.0</b> | <b>1470.0</b> | <b>72.5</b> | <b>1993.0</b> | <b>148.0</b> | <b>2412.0</b> | <b>222.0</b> | <b>-</b>                     | <b>-</b>     |
| <b>Vitamin C (mg)</b>  |            |                     |                 |               |                 |              |                 |              |             |              |             |               |             |               |             |               |              |               |              |                              |              |
| <b>Male</b>            |            |                     |                 |               |                 |              |                 |              |             |              |             |               |             |               |             |               |              |               |              |                              |              |
| 20-30                  | 76         | 75                  | 2000            | 141.0         | 97.8            | 40.0         | 12.6            | 51.0         | 13.1        | 76.0         | 13.5        | 116.0         | 16.2        | 177.0         | 30.6        | 259.0         | 62.6         | 325.0         | 94.1         | 24.4                         | 0.0          |
| 31-50                  | 84         | 75                  | 2000            | 275.8         | 530.5           | 43.0         | 11.6            | 54.0         | 12.3        | 81.0         | 15.2        | 141.0         | 25.9        | 275.0         | 76.1        | 556.0         | 244.0        | 883.0         | 493.0        | 21.6                         | 1.2          |
| 50+                    | 56         | 75                  | 2000            | 841.8         | 867.3           | 98.0         | 75.6            | 149.0        | 100.0       | 297.0        | 128.0       | 577.0         | 174.0       | 1073.0        | 396.0       | 1834.0        | 892.0        | 2485.0        | 1380.0       | 2.8                          | 8.3          |
| <b>Female</b>          |            |                     |                 |               |                 |              |                 |              |             |              |             |               |             |               |             |               |              |               |              |                              |              |
| 20-30                  | 111        | 60                  | 2000            | 267.3         | 637.6           | 33.0         | 8.2             | 42.0         | 9.0         | 65.0         | 11.7        | 117.0         | 21.4        | 243.0         | 68.1        | 537.0         | 237.0        | 899.0         | 500.0        | 22.0                         | 1.5          |
| 31-50                  | 91         | 60                  | 2000            | 299.0         | 1087.0          | 32.0         | 8.9             | 41.0         | 9.0         | 64.0         | 9.9         | 109.0         | 16.6        | 219.0         | 58.4        | 512.0         | 243.0        | 939.0         | 586.0        | 22.4                         | 1.9          |
| 50+                    | 88         | 60                  | 2000            | 171.8         | 165.8           | 52.0         | 13.9            | 66.0         | 13.2        | 92.0         | 10.8        | 130.0         | 12.3        | 194.0         | 29.4        | 304.0         | 79.1         | 417.0         | 144.0        | 7.6                          | 0.1          |
| <b>All</b>             | <b>506</b> | <b>-</b>            | <b>-</b>        | <b>246.6</b>  | <b>341.2</b>    | <b>37.0</b>  | <b>3.9</b>      | <b>47.0</b>  | <b>4.1</b>  | <b>70.0</b>  | <b>4.8</b>  | <b>126.0</b>  | <b>10.1</b> | <b>287.0</b>  | <b>35.4</b> | <b>580.0</b>  | <b>77.3</b>  | <b>828.0</b>  | <b>126.0</b> | <b>-</b>                     | <b>-</b>     |

**Table S1. Continued.**

| Age (years)            | N          | EAR/AI <sup>1</sup> | UL <sup>2</sup>   | Mean         | SD <sup>3</sup> | P5          | SE <sup>4</sup> | P10         | SE         | P25         | SE         | P50          | SE         | P75          | SE         | P90          | SE          | P95          | SE          | Prevalence of inadequacy (%) | Above UL (%) |
|------------------------|------------|---------------------|-------------------|--------------|-----------------|-------------|-----------------|-------------|------------|-------------|------------|--------------|------------|--------------|------------|--------------|-------------|--------------|-------------|------------------------------|--------------|
| <b>Vitamin D (mcg)</b> |            |                     |                   |              |                 |             |                 |             |            |             |            |              |            |              |            |              |             |              |             |                              |              |
| <b>Male</b>            |            |                     |                   |              |                 |             |                 |             |            |             |            |              |            |              |            |              |             |              |             |                              |              |
| 20-30                  | 76         | 10                  | 100               | 6.0          | 3.1             | 2.3         | 0.6             | 2.8         | 0.6        | 3.8         | 0.5        | 5.4          | 0.6        | 7.6          | 1.0        | 10.1         | 1.8         | 12.0         | 2.5         | 89.6                         | 0.0          |
| 31-50                  | 84         | 10                  | 100               | 6.1          | 2.2             | 3.1         | 0.7             | 3.6         | 0.7        | 4.5         | 0.6        | 5.7          | 0.6        | 7.3          | 0.9        | 8.9          | 1.5         | 10.1         | 2.0         | 94.8                         | 0.0          |
| 50+                    | 56         | 10                  | 100               | 5.4          | 2.5             | 2.2         | 0.6             | 2.7         | 0.6        | 3.6         | 0.6        | 5.0          | 0.6        | 6.7          | 0.9        | 8.7          | 1.6         | 10.0         | 2.1         | 94.9                         | 0.0          |
| <b>Female</b>          |            |                     |                   |              |                 |             |                 |             |            |             |            |              |            |              |            |              |             |              |             |                              |              |
| 20-30                  | 111        | 10                  | 100               | 4.1          | 1.9             | 1.7         | 0.3             | 2.0         | 0.3        | 2.7         | 0.3        | 3.8          | 0.3        | 5.0          | 0.5        | 6.5          | 0.9         | 7.5          | 1.3         | 98.9                         | 0.0          |
| 31-50                  | 91         | 10                  | 100               | 3.5          | 1.7             | 1.3         | 0.3             | 1.7         | 0.3        | 2.3         | 0.3        | 3.3          | 0.3        | 4.4          | 0.5        | 5.8          | 0.8         | 6.7          | 1.1         | 99.7                         | 0.0          |
| 50+                    | 88         | 10                  | 100               | 3.8          | 2.0             | 1.2         | 0.3             | 1.5         | 0.3        | 2.3         | 0.3        | 3.4          | 0.3        | 4.9          | 0.5        | 6.4          | 0.8         | 7.4          | 1.1         | 99.2                         | 0.0          |
| <b>All</b>             | <b>506</b> | <b>-</b>            | <b>-</b>          | <b>4.8</b>   | <b>2.6</b>      | <b>1.7</b>  | <b>0.2</b>      | <b>2.1</b>  | <b>0.2</b> | <b>2.9</b>  | <b>0.2</b> | <b>4.2</b>   | <b>0.2</b> | <b>6.0</b>   | <b>0.3</b> | <b>8.1</b>   | <b>0.6</b>  | <b>9.7</b>   | <b>0.8</b>  | <b>-</b>                     | <b>-</b>     |
| <b>Vitamin E (mg)</b>  |            |                     |                   |              |                 |             |                 |             |            |             |            |              |            |              |            |              |             |              |             |                              |              |
| <b>Male</b>            |            |                     |                   |              |                 |             |                 |             |            |             |            |              |            |              |            |              |             |              |             |                              |              |
| 20-30                  | 76         | 12                  | 1000 <sup>a</sup> | 8.7          | 3.5             | 4.0         | 0.7             | 4.8         | 0.6        | 6.2         | 0.5        | 8.2          | 0.5        | 10.6         | 0.8        | 13.4         | 1.4         | 15.2         | 1.9         | 83.9                         | -            |
| 31-50                  | 84         | 12                  | 1000 <sup>a</sup> | 8.6          | 3.0             | 4.7         | 0.6             | 5.3         | 0.6        | 6.5         | 0.5        | 8.1          | 0.5        | 10.2         | 0.8        | 12.5         | 1.4         | 14.1         | 2.0         | 87.7                         | -            |
| 50+                    | 56         | 12                  | 1000 <sup>a</sup> | 7.3          | 2.4             | 4.3         | 0.6             | 4.8         | 0.6        | 5.7         | 0.5        | 6.9          | 0.4        | 8.5          | 0.7        | 10.3         | 1.4         | 11.7         | 1.9         | 95.6                         | -            |
| <b>Female</b>          |            |                     |                   |              |                 |             |                 |             |            |             |            |              |            |              |            |              |             |              |             |                              |              |
| 20-30                  | 111        | 12                  | 1000 <sup>a</sup> | 6.3          | 1.5             | 4.1         | 0.4             | 4.5         | 0.4        | 5.2         | 0.3        | 6.1          | 0.3        | 7.2          | 0.5        | 8.3          | 0.7         | 9.1          | 0.9         | 99.8                         | -            |
| 31-50                  | 91         | 12                  | 1000 <sup>a</sup> | 6.3          | 2.1             | 3.5         | 0.5             | 3.9         | 0.4        | 4.8         | 0.4        | 6.0          | 0.4        | 7.4          | 0.6        | 9.0          | 1.0         | 10.1         | 1.3         | 98.5                         | -            |
| 50+                    | 88         | 12                  | 1000 <sup>a</sup> | 5.9          | 2.2             | 3.2         | 0.4             | 3.6         | 0.3        | 4.4         | 0.3        | 5.5          | 0.3        | 7.0          | 0.6        | 8.8          | 1.1         | 10.1         | 1.5         | 98.0                         | -            |
| <b>All</b>             | <b>506</b> | <b>-</b>            | <b>-</b>          | <b>7.2</b>   | <b>2.7</b>      | <b>3.7</b>  | <b>0.2</b>      | <b>4.3</b>  | <b>0.2</b> | <b>5.3</b>  | <b>0.2</b> | <b>6.7</b>   | <b>0.2</b> | <b>8.5</b>   | <b>0.3</b> | <b>10.6</b>  | <b>0.5</b>  | <b>12.2</b>  | <b>0.7</b>  | <b>-</b>                     | <b>-</b>     |
| <b>Vitamin K (mcg)</b> |            |                     |                   |              |                 |             |                 |             |            |             |            |              |            |              |            |              |             |              |             |                              |              |
| <b>Male</b>            |            |                     |                   |              |                 |             |                 |             |            |             |            |              |            |              |            |              |             |              |             |                              |              |
| 20-30                  | 76         | 120 <sup>b</sup>    | -                 | 123.4        | 61.7            | 55.0        | 10.2            | 64.0        | 9.8        | 83.0        | 8.9        | 110.0        | 9.6        | 148.0        | 17.3       | 198.0        | 35.4        | 238.0        | 53.4        | -                            | -            |
| 31-50                  | 84         | 120 <sup>b</sup>    | -                 | 126.2        | 42.5            | 70.0        | 11.6            | 78.0        | 10.9       | 96.0        | 9.6        | 120.0        | 9.6        | 149.0        | 14.8       | 182.0        | 25.0        | 205.0        | 33.7        | -                            | -            |
| 50+                    | 56         | 120 <sup>b</sup>    | -                 | 119.1        | 27.0            | 79.0        | 13.5            | 86.0        | 12.1       | 100.0       | 9.7        | 117.0        | 8.7        | 136.0        | 12.2       | 155.0        | 18.8        | 167.0        | 24.0        | -                            | -            |
| <b>Female</b>          |            |                     |                   |              |                 |             |                 |             |            |             |            |              |            |              |            |              |             |              |             |                              |              |
| 20-30                  | 111        | 90 <sup>b</sup>     | -                 | 118.4        | 46.8            | 59.0        | 9.8             | 68.0        | 9.4        | 85.0        | 8.6        | 110.0        | 9.1        | 142.0        | 14.7       | 179.0        | 25.8        | 206.0        | 35.5        | -                            | -            |
| 31-50                  | 91         | 90 <sup>b</sup>     | -                 | 127.5        | 65.4            | 52.0        | 10.0            | 62.0        | 10.0       | 82.0        | 9.7        | 113.0        | 10.9       | 156.0        | 19.1       | 210.0        | 36.0        | 251.0        | 51.7        | -                            | -            |
| 50+                    | 88         | 90 <sup>b</sup>     | -                 | 112.2        | 58.8            | 47.0        | 8.5             | 55.0        | 8.4        | 72.0        | 8.2        | 99.0         | 9.3        | 137.0        | 16.9       | 186.0        | 33.0        | 223.0        | 48.3        | -                            | -            |
| <b>All</b>             | <b>506</b> | <b>-</b>            | <b>-</b>          | <b>122.3</b> | <b>54.8</b>     | <b>56.0</b> | <b>4.2</b>      | <b>65.0</b> | <b>4.1</b> | <b>84.0</b> | <b>3.8</b> | <b>111.0</b> | <b>4.2</b> | <b>149.0</b> | <b>6.9</b> | <b>193.0</b> | <b>12.4</b> | <b>226.0</b> | <b>17.4</b> | <b>-</b>                     | <b>-</b>     |

**Table S1. Continued.**

| Age (years)            | N          | EAR/AI <sup>1</sup> | UL <sup>2</sup> | Mean        | SD <sup>3</sup> | P5          | SE <sup>4</sup> | P10         | SE         | P25         | SE         | P50         | SE         | P75         | SE         | P90         | SE         | P95         | SE         | Prevalence of inadequacy (%) | Above UL (%) |
|------------------------|------------|---------------------|-----------------|-------------|-----------------|-------------|-----------------|-------------|------------|-------------|------------|-------------|------------|-------------|------------|-------------|------------|-------------|------------|------------------------------|--------------|
| <b>Vitamin B1 (mg)</b> |            |                     |                 |             |                 |             |                 |             |            |             |            |             |            |             |            |             |            |             |            |                              |              |
| <b>Male</b>            |            |                     |                 |             |                 |             |                 |             |            |             |            |             |            |             |            |             |            |             |            |                              |              |
| 20-30                  | 76         | 1                   | -               | 1.9         | 0.6             | 1.1         | 0.1             | 1.2         | 0.1        | 1.5         | 0.1        | 1.8         | 0.1        | 2.2         | 0.1        | 2.7         | 0.2        | 2.9         | 0.3        | 3.4                          | -            |
| 31-50                  | 84         | 1                   | -               | 1.8         | 0.7             | 1.0         | 0.1             | 1.1         | 0.1        | 1.3         | 0.1        | 1.7         | 0.1        | 2.2         | 0.2        | 2.7         | 0.3        | 3.1         | 0.4        | 6.0                          | -            |
| 50+                    | 56         | 1                   | -               | 1.8         | 0.4             | 1.2         | 0.1             | 1.3         | 0.1        | 1.5         | 0.1        | 1.7         | 0.1        | 2.0         | 0.2        | 2.3         | 0.3        | 2.6         | 0.3        | 0.7                          | -            |
| <b>Female</b>          |            |                     |                 |             |                 |             |                 |             |            |             |            |             |            |             |            |             |            |             |            |                              |              |
| 20-30                  | 111        | 0.9                 | -               | 1.4         | 0.3             | 1.0         | 0.1             | 1.0         | 0.1        | 1.2         | 0.1        | 1.3         | 0.1        | 1.5         | 0.1        | 1.7         | 0.1        | 1.8         | 0.2        | 2.3                          | -            |
| 31-50                  | 91         | 0.9                 | -               | 1.3         | 0.3             | 0.8         | 0.1             | 0.9         | 0.1        | 1.1         | 0.1        | 1.2         | 0.1        | 1.5         | 0.1        | 1.7         | 0.1        | 1.8         | 0.2        | 9.8                          | -            |
| 50+                    | 88         | 0.9                 | -               | 1.3         | 0.1             | 1.1         | 0.1             | 1.1         | 0.1        | 1.2         | 0.1        | 1.3         | 0.0        | 1.4         | 0.1        | 1.5         | 0.1        | 1.5         | 0.1        | 0.1                          | -            |
| <b>All</b>             | <b>506</b> | <b>-</b>            | <b>-</b>        | <b>1.5</b>  | <b>0.5</b>      | <b>0.9</b>  | <b>0.0</b>      | <b>1.0</b>  | <b>0.0</b> | <b>1.2</b>  | <b>0.0</b> | <b>1.5</b>  | <b>0.0</b> | <b>1.8</b>  | <b>0.0</b> | <b>2.2</b>  | <b>0.1</b> | <b>2.4</b>  | <b>0.1</b> | <b>-</b>                     | <b>-</b>     |
| <b>Vitamin B2 (mg)</b> |            |                     |                 |             |                 |             |                 |             |            |             |            |             |            |             |            |             |            |             |            |                              |              |
| <b>Male</b>            |            |                     |                 |             |                 |             |                 |             |            |             |            |             |            |             |            |             |            |             |            |                              |              |
| 20-30                  | 76         | 1.1                 | -               | 2.1         | 0.4             | 1.4         | 0.2             | 1.5         | 0.1        | 1.8         | 0.1        | 2.0         | 0.1        | 2.3         | 0.1        | 2.6         | 0.2        | 2.8         | 0.2        | 0.6                          | -            |
| 31-50                  | 84         | 1.1                 | -               | 1.9         | 0.6             | 1.1         | 0.1             | 1.2         | 0.1        | 1.5         | 0.1        | 1.9         | 0.1        | 2.3         | 0.1        | 2.8         | 0.2        | 3.1         | 0.3        | 6.3                          | -            |
| 50+                    | 56         | 1.1                 | -               | 2.0         | 0.5             | 1.3         | 0.2             | 1.4         | 0.2        | 1.7         | 0.1        | 2.0         | 0.1        | 2.3         | 0.2        | 2.7         | 0.3        | 2.9         | 0.4        | 1.2                          | -            |
| <b>Female</b>          |            |                     |                 |             |                 |             |                 |             |            |             |            |             |            |             |            |             |            |             |            |                              |              |
| 20-30                  | 111        | 0.9                 | -               | 1.5         | 0.2             | 1.2         | 0.1             | 1.3         | 0.1        | 1.4         | 0.1        | 1.5         | 0.1        | 1.6         | 0.1        | 1.7         | 0.1        | 1.8         | 0.1        | 0.0                          | -            |
| 31-50                  | 91         | 0.9                 | -               | 1.4         | 0.2             | 1.0         | 0.1             | 1.1         | 0.1        | 1.2         | 0.1        | 1.4         | 0.1        | 1.6         | 0.1        | 1.7         | 0.1        | 1.8         | 0.1        | 1.1                          | -            |
| 50+                    | 88         | 0.9                 | -               | 1.4         | 0.2             | 1.1         | 0.1             | 1.2         | 0.1        | 1.3         | 0.1        | 1.4         | 0.0        | 1.6         | 0.1        | 1.8         | 0.1        | 1.9         | 0.1        | 0.6                          | -            |
| <b>All</b>             | <b>506</b> | <b>-</b>            | <b>-</b>        | <b>1.7</b>  | <b>0.5</b>      | <b>1.0</b>  | <b>0.0</b>      | <b>1.2</b>  | <b>0.0</b> | <b>1.4</b>  | <b>0.0</b> | <b>1.6</b>  | <b>0.0</b> | <b>2.0</b>  | <b>0.0</b> | <b>2.3</b>  | <b>0.1</b> | <b>2.5</b>  | <b>0.1</b> | <b>-</b>                     | <b>-</b>     |
| <b>Vitamin B3 (mg)</b> |            |                     |                 |             |                 |             |                 |             |            |             |            |             |            |             |            |             |            |             |            |                              |              |
| <b>Male</b>            |            |                     |                 |             |                 |             |                 |             |            |             |            |             |            |             |            |             |            |             |            |                              |              |
| 20-30                  | 76         | 12                  | 35 <sup>a</sup> | 39.8        | 7.9             | 28.1        | 3.7             | 30.2        | 3.3        | 34.2        | 2.7        | 39.1        | 2.4        | 44.6        | 3.4        | 50.2        | 5.2        | 53.8        | 6.6        | 0.0                          | -            |
| 31-50                  | 84         | 12                  | 35 <sup>a</sup> | 30.2        | 8.8             | 18.0        | 2.4             | 20.0        | 2.3        | 23.9        | 1.9        | 29.0        | 1.9        | 35.2        | 2.8        | 41.8        | 4.5        | 46.3        | 6.0        | 0.2                          | -            |
| 50+                    | 56         | 12                  | 35 <sup>a</sup> | 25.3        | 6.7             | 16.0        | 2.1             | 17.6        | 1.9        | 20.5        | 1.6        | 24.5        | 1.5        | 29.2        | 2.3        | 34.2        | 3.9        | 37.6        | 5.1        | 0.3                          | -            |
| <b>Female</b>          |            |                     |                 |             |                 |             |                 |             |            |             |            |             |            |             |            |             |            |             |            |                              |              |
| 20-30                  | 111        | 11                  | 35 <sup>a</sup> | 21.5        | 3.1             | 16.8        | 1.8             | 17.8        | 1.6        | 19.4        | 1.2        | 21.3        | 1.1        | 23.5        | 1.5        | 25.6        | 2.2        | 26.9        | 2.7        | 0.0                          | -            |
| 31-50                  | 91         | 11                  | 35 <sup>a</sup> | 19.0        | 4.3             | 12.5        | 1.4             | 13.7        | 1.3        | 15.9        | 1.0        | 18.6        | 0.9        | 21.7        | 1.3        | 24.7        | 2.0        | 26.7        | 2.5        | 1.6                          | -            |
| 50+                    | 88         | 11                  | 35 <sup>a</sup> | 18.0        | 0.7             | 16.9        | 1.5             | 17.1        | 1.2        | 17.5        | 0.9        | 18.0        | 0.8        | 18.5        | 1.0        | 19.0        | 1.4        | 19.3        | 1.6        | 0.0                          | -            |
| <b>All</b>             | <b>506</b> | <b>-</b>            | <b>-</b>        | <b>25.3</b> | <b>8.8</b>      | <b>13.8</b> | <b>0.7</b>      | <b>15.6</b> | <b>0.7</b> | <b>19.0</b> | <b>0.6</b> | <b>23.9</b> | <b>0.6</b> | <b>30.0</b> | <b>1.0</b> | <b>36.8</b> | <b>1.7</b> | <b>41.6</b> | <b>2.3</b> | <b>-</b>                     | <b>-</b>     |

Table S1. Continued.

| Age (years)              | N          | EAR/AI <sup>1</sup> | UL <sup>2</sup> | Mean       | SD <sup>3</sup> | P5         | SE <sup>4</sup> | P10        | SE         | P25        | SE         | P50        | SE         | P75        | SE         | P90        | SE         | P95         | SE         | Prevalence of inadequacy (%) | Above UL (%) |
|--------------------------|------------|---------------------|-----------------|------------|-----------------|------------|-----------------|------------|------------|------------|------------|------------|------------|------------|------------|------------|------------|-------------|------------|------------------------------|--------------|
| <b>Vitamin B5 (mg)</b>   |            |                     |                 |            |                 |            |                 |            |            |            |            |            |            |            |            |            |            |             |            |                              |              |
| <b>Male</b>              |            |                     |                 |            |                 |            |                 |            |            |            |            |            |            |            |            |            |            |             |            |                              |              |
| 20-30                    | 76         | 5 <sup>b</sup>      | -               | 7.1        | 1.7             | 4.6        | 0.5             | 5.1        | 0.4        | 5.9        | 0.4        | 6.9        | 0.3        | 8.1        | 0.5        | 9.3        | 0.7        | 10.1        | 0.9        | -                            | -            |
| 31-50                    | 84         | 5 <sup>b</sup>      | -               | 6.3        | 1.8             | 3.8        | 0.4             | 4.2        | 0.4        | 5.0        | 0.3        | 6.1        | 0.3        | 7.4        | 0.4        | 8.7        | 0.7        | 9.5         | 0.9        | -                            | -            |
| 50+                      | 56         | 5 <sup>b</sup>      | -               | 6.3        | 1.4             | 4.2        | 0.5             | 4.6        | 0.5        | 5.3        | 0.4        | 6.1        | 0.3        | 7.1        | 0.5        | 8.1        | 0.8        | 8.8         | 1.0        | -                            | -            |
| <b>Female</b>            |            |                     |                 |            |                 |            |                 |            |            |            |            |            |            |            |            |            |            |             |            |                              |              |
| 20-30                    | 111        | 5 <sup>b</sup>      | -               | 4.8        | 0.4             | 4.2        | 0.3             | 4.3        | 0.3        | 4.5        | 0.2        | 4.8        | 0.2        | 5.1        | 0.2        | 5.4        | 0.3        | 5.5         | 0.4        | -                            | -            |
| 31-50                    | 91         | 5 <sup>b</sup>      | -               | 4.3        | 0.9             | 3.0        | 0.3             | 3.2        | 0.2        | 3.7        | 0.2        | 4.3        | 0.2        | 4.9        | 0.2        | 5.6        | 0.4        | 6.0         | 0.5        | -                            | -            |
| 50+                      | 88         | 5 <sup>b</sup>      | -               | 4.7        | 0.8             | 3.6        | 0.2             | 3.8        | 0.2        | 4.2        | 0.2        | 4.6        | 0.1        | 5.2        | 0.2        | 5.7        | 0.3        | 6.1         | 0.4        | -                            | -            |
| <b>All</b>               | <b>506</b> | <b>-</b>            | <b>-</b>        | <b>5.5</b> | <b>1.5</b>      | <b>3.4</b> | <b>0.1</b>      | <b>3.7</b> | <b>0.1</b> | <b>4.4</b> | <b>0.1</b> | <b>5.3</b> | <b>0.1</b> | <b>6.3</b> | <b>0.2</b> | <b>7.5</b> | <b>0.3</b> | <b>8.3</b>  | <b>0.3</b> | <b>-</b>                     | <b>-</b>     |
| <b>Vitamin B6 (mg)</b>   |            |                     |                 |            |                 |            |                 |            |            |            |            |            |            |            |            |            |            |             |            |                              |              |
| <b>Male</b>              |            |                     |                 |            |                 |            |                 |            |            |            |            |            |            |            |            |            |            |             |            |                              |              |
| 20-30                    | 76         | 1.1                 | 100             | 3.0        | 0.9             | 1.8        | 0.2             | 2.0        | 0.2        | 2.4        | 0.2        | 3.0        | 0.2        | 3.6        | 0.2        | 4.2        | 0.4        | 4.6         | 0.5        | 0.1                          | 0            |
| 31-50                    | 84         | 1.1                 | 100             | 2.3        | 0.7             | 1.4        | 0.2             | 1.5        | 0.2        | 1.8        | 0.1        | 2.2        | 0.1        | 2.7        | 0.2        | 3.3        | 0.3        | 3.6         | 0.4        | 1.1                          | 0            |
| 50+                      | 56         | 1.4                 | 100             | 2.2        | 0.6             | 1.4        | 0.2             | 1.5        | 0.2        | 2.1        | 0.1        | 2.1        | 0.1        | 2.5        | 0.2        | 3.0        | 0.3        | 3.3         | 0.4        | 6.5                          | 0            |
| <b>Female</b>            |            |                     |                 |            |                 |            |                 |            |            |            |            |            |            |            |            |            |            |             |            |                              |              |
| 20-30                    | 111        | 1.1                 | 100             | 1.7        | 0.3             | 1.3        | 1.3             | 1.4        | 0.1        | 1.5        | 0.1        | 1.7        | 0.1        | 1.9        | 0.1        | 2.1        | 0.2        | 2.2         | 0.2        | 0.5                          | 0            |
| 31-50                    | 91         | 1.1                 | 100             | 1.6        | 0.4             | 1.0        | 0.1             | 1.1        | 0.1        | 1.3        | 0.1        | 1.5        | 0.1        | 1.8        | 0.1        | 2.1        | 0.2        | 2.3         | 0.2        | 10.9                         | 0            |
| 50+                      | 88         | 1.3                 | 100             | 1.6        | 0.1             | 1.5        | 0.1             | 1.5        | 0.1        | 1.5        | 0.1        | 1.6        | 0.1        | 1.6        | 0.1        | 1.7        | 0.1        | 1.7         | 0.1        | 0.0                          | 0            |
| <b>All</b>               | <b>506</b> | <b>-</b>            | <b>-</b>        | <b>2.0</b> | <b>0.7</b>      | <b>1.1</b> | <b>0.1</b>      | <b>1.3</b> | <b>0.1</b> | <b>1.5</b> | <b>0.0</b> | <b>1.9</b> | <b>0.0</b> | <b>2.4</b> | <b>0.1</b> | <b>2.9</b> | <b>0.1</b> | <b>3.3</b>  | <b>0.2</b> | <b>-</b>                     | <b>-</b>     |
| <b>Vitamin B12 (mcg)</b> |            |                     |                 |            |                 |            |                 |            |            |            |            |            |            |            |            |            |            |             |            |                              |              |
| <b>Male</b>              |            |                     |                 |            |                 |            |                 |            |            |            |            |            |            |            |            |            |            |             |            |                              |              |
| 20-30                    | 76         | 2                   | -               | 6.4        | 1.5             | 4.1        | 0.7             | 5.3        | 0.5        | 6.2        | 0.4        | 7.3        | 0.6        | 7.3        | 0.6        | 8.3        | 1.0        | 9.0         | 1.3        | 0.0                          | -            |
| 31-50                    | 84         | 2                   | -               | 5.4        | 2.5             | 2.1        | 0.4             | 2.6        | 0.4        | 3.6        | 0.4        | 4.9        | 0.4        | 6.7        | 0.6        | 8.7        | 1.1        | 10.1        | 1.5        | 3.9                          | -            |
| 50+                      | 56         | 2                   | -               | 6.8        | 4.4             | 2.9        | 0.6             | 3.3        | 0.6        | 4.1        | 0.6        | 5.5        | 0.8        | 7.9        | 1.7        | 11.4       | 4.0        | 14.6        | 6.6        | 0.2                          | -            |
| <b>Female</b>            |            |                     |                 |            |                 |            |                 |            |            |            |            |            |            |            |            |            |            |             |            |                              |              |
| 20-30                    | 111        | 2                   | -               | 4.7        | 3.6             | 2.1        | 0.3             | 2.3        | 0.2        | 2.8        | 0.2        | 3.7        | 0.3        | 5.2        | 0.8        | 7.8        | 1.9        | 10.3        | 3.4        | 3.9                          | -            |
| 31-50                    | 91         | 2                   | -               | 3.8        | 1.8             | 1.6        | 0.3             | 1.9        | 0.2        | 2.5        | 0.2        | 3.4        | 0.3        | 4.7        | 0.4        | 6.0        | 0.7        | 7.0         | 1.1        | 11.8                         | -            |
| 50+                      | 88         | 2                   | -               | 3.2        | 1.1             | 1.6        | 0.3             | 1.9        | 0.3        | 2.4        | 0.2        | 3.1        | 0.2        | 3.8        | 0.3        | 4.6        | 0.4        | 5.1         | 0.6        | 12.7                         | -            |
| <b>All</b>               | <b>506</b> | <b>-</b>            | <b>-</b>        | <b>5.0</b> | <b>3.5</b>      | <b>1.9</b> | <b>0.1</b>      | <b>2.3</b> | <b>0.1</b> | <b>3.0</b> | <b>0.1</b> | <b>4.1</b> | <b>0.1</b> | <b>5.7</b> | <b>0.3</b> | <b>8.5</b> | <b>0.8</b> | <b>11.1</b> | <b>1.3</b> | <b>-</b>                     | <b>-</b>     |

**Table S1. Continued.**

| Age (years)         | N   | EAR/AI <sup>1</sup> | UL <sup>2</sup>   | Mean  | SD <sup>3</sup> | P5    | SE <sup>4</sup> | P10   | SE   | P25   | SE   | P50   | SE   | P75   | SE   | P90   | SE   | P95   | SE   | Prevalence of inadequacy (%) | Above UL (%) |
|---------------------|-----|---------------------|-------------------|-------|-----------------|-------|-----------------|-------|------|-------|------|-------|------|-------|------|-------|------|-------|------|------------------------------|--------------|
| <b>Folate (mcg)</b> |     |                     |                   |       |                 |       |                 |       |      |       |      |       |      |       |      |       |      |       |      |                              |              |
| <b>Male</b>         |     |                     |                   |       |                 |       |                 |       |      |       |      |       |      |       |      |       |      |       |      |                              |              |
| 20-30               | 76  | 400                 | 1000 <sup>a</sup> | 403.8 | 130.7           | 228.0 | 27.8            | 256.0 | 25.9 | 310.0 | 22.4 | 384.0 | 22.1 | 476.0 | 34.5 | 576.0 | 58.3 | 646.0 | 78.0 | 28.2                         | -            |
| 31-50               | 84  | 400                 | 1000 <sup>a</sup> | 394.3 | 93.7            | 256.0 | 29.3            | 281.0 | 26.3 | 328.0 | 21.2 | 386.0 | 19.2 | 452.0 | 27.2 | 518.0 | 42.1 | 561.0 | 53.7 | 22.1                         | -            |
| 50+                 | 56  | 400                 | 1000 <sup>a</sup> | 436.4 | 133.7           | 252.0 | 34.9            | 282.0 | 32.3 | 341.0 | 27.3 | 418.0 | 25.9 | 512.0 | 39.6 | 613.0 | 66.1 | 682.0 | 88.0 | 18.9                         | -            |
| <b>Female</b>       |     |                     |                   |       |                 |       |                 |       |      |       |      |       |      |       |      |       |      |       |      |                              |              |
| 20-30               | 111 | 400                 | 1000 <sup>a</sup> | 310.2 | 76.8            | 198.0 | 19.5            | 218.0 | 17.7 | 255.0 | 14.5 | 303.0 | 13.4 | 357.0 | 19.1 | 412.0 | 29.6 | 448.0 | 37.9 | 58.9                         | -            |
| 31-50               | 91  | 400                 | 1000 <sup>a</sup> | 297.2 | 71.3            | 191.0 | 20.6            | 210.0 | 18.3 | 247.0 | 14.7 | 291.0 | 13.2 | 342.0 | 18.3 | 391.0 | 27.9 | 423.0 | 35.2 | 65.3                         | -            |
| 50+                 | 88  | 400                 | 1000 <sup>a</sup> | 308.6 | 47.5            | 236.0 | 21.2            | 250.0 | 18.6 | 275.0 | 14.4 | 306.0 | 12.6 | 339.0 | 16.9 | 371.0 | 25.2 | 391.0 | 31.4 | 61.6                         | -            |
| <b>All</b>          | 506 | -                   | -                 | 350.8 | 105.0           | 205.0 | 9.6             | 229.0 | 8.9  | 276.0 | 7.6  | 337.0 | 7.3  | 411.0 | 11.0 | 490.0 | 18.0 | 543.0 | 23.7 | -                            | -            |

<sup>1</sup>Estimated Average Requirements/ Adequate Intake

<sup>2</sup>Tolerable Upper Intake Levels

<sup>3</sup>Standard Deviation

<sup>4</sup>Standard Error

<sup>a</sup>The ULs for vitamin E, niacin, and folate apply to synthetic forms obtained from supplements, fortified foods, or a combination of the two.

<sup>b</sup>Adequate Intake (AI)

\*Inadequate iron intake was calculated using the probabilistic approach



**Table S2. Distribution of mean and percentiles of usual intake of energy and macronutrients according to gender and age. Brazil, 2016-2017.**

| Age<br>(years)          | N          | Mean        | SD <sup>1</sup> | P5          | SE <sup>2</sup> | P10         | SE          | P25         | SE          | P50         | SE          | P75         | SE          | P90         | SE          | P95         | SE          |
|-------------------------|------------|-------------|-----------------|-------------|-----------------|-------------|-------------|-------------|-------------|-------------|-------------|-------------|-------------|-------------|-------------|-------------|-------------|
| <b>Energy (kcal)</b>    |            |             |                 |             |                 |             |             |             |             |             |             |             |             |             |             |             |             |
| <b>Male</b>             |            |             |                 |             |                 |             |             |             |             |             |             |             |             |             |             |             |             |
| 20-30                   | 76         | 2589        | 476.7           | 1847        | 177             | 1995        | 154         | 2256        | 118         | 2566        | 102         | 2897        | 136         | 3214        | 199         | 3412        | 244         |
| 31-50                   | 84         | 2390        | 727.6           | 1380        | 139             | 1548        | 128         | 1869        | 106         | 2295        | 98.5        | 2808        | 153         | 3354        | 256         | 3724        | 339         |
| 50+                     | 56         | 2008        | 343.8           | 1516        | 141             | 1605        | 115         | 1761        | 86.3        | 1965        | 87.2        | 2222        | 137         | 2485        | 197         | 2645        | 221         |
| <b>Female</b>           |            |             |                 |             |                 |             |             |             |             |             |             |             |             |             |             |             |             |
| 20-30                   | 111        | 1753        | 210.4           | 1419        | 93.8            | 1488        | 81          | 1607        | 61.6        | 1746        | 52.2        | 1891        | 67          | 2026        | 95.8        | 2110        | 117         |
| 31-50                   | 91         | 1699        | 398.0           | 1108        | 107             | 1219        | 94.5        | 1419        | 74          | 1665        | 65.7        | 1941        | 93.1        | 2221        | 147         | 2406        | 189         |
| 50+                     | 88         | 1618        | 304.9           | 1156        | 89.4            | 1244        | 78.9        | 1402        | 61.9        | 1596        | 54.5        | 1809        | 75.4        | 2019        | 115         | 2153        | 144         |
| <b>All</b>              | <b>506</b> | <b>1984</b> | <b>556.1</b>    | <b>1203</b> | <b>48.7</b>     | <b>1336</b> | <b>43.6</b> | <b>1585</b> | <b>35.7</b> | <b>1913</b> | <b>34.3</b> | <b>2310</b> | <b>52.3</b> | <b>2729</b> | <b>83.4</b> | <b>3006</b> | <b>106</b>  |
| <b>Carbohydrate (g)</b> |            |             |                 |             |                 |             |             |             |             |             |             |             |             |             |             |             |             |
| <b>Male</b>             |            |             |                 |             |                 |             |             |             |             |             |             |             |             |             |             |             |             |
| 20-30                   | 76         | 269         | 72.8            | 162         | 19.6            | 181         | 17.6        | 217         | 14.3        | 262         | 13.1        | 313         | 18.9        | 365         | 29.5        | 399         | 37.4        |
| 31-50                   | 84         | 267         | 97.5            | 122         | 22.1            | 148         | 20.1        | 197         | 16.1        | 259         | 14.2        | 328         | 20.3        | 397         | 31.6        | 441         | 40          |
| 50+                     | 56         | 251         | 61.8            | 162         | 19.1            | 178         | 17.3        | 207         | 14.1        | 244         | 13.0        | 287         | 19.2        | 332         | 31          | 363         | 40.4        |
| <b>Female</b>           |            |             |                 |             |                 |             |             |             |             |             |             |             |             |             |             |             |             |
| 20-30                   | 111        | 211         | 44.0            | 144         | 12.8            | 157         | 11.4        | 180         | 9.07        | 207         | 8.1         | 238         | 11.1        | 269         | 16.7        | 288         | 20.9        |
| 31-50                   | 91         | 208         | 61.0            | 121         | 15.6            | 137         | 13.6        | 166         | 10          | 201         | 8.7         | 241         | 13.3        | 285         | 23.9        | 317         | 32.8        |
| 50+                     | 88         | 206         | 46.3            | 137         | 12.9            | 150         | 11.6        | 173         | 9.29        | 202         | 8.4         | 234         | 11.8        | 267         | 18.3        | 288         | 23.3        |
| <b>All</b>              | <b>506</b> | <b>233</b>  | <b>71.1</b>     | <b>132</b>  | <b>6.8</b>      | <b>150</b>  | <b>6.12</b> | <b>183</b>  | <b>4.88</b> | <b>224</b>  | <b>4.5</b>  | <b>273</b>  | <b>6.68</b> | <b>325</b>  | <b>11.2</b> | <b>361</b>  | <b>14.9</b> |

Table S2. Continued.

| Age<br>(years)     | <i>N</i> | Mean | SD <sup>1</sup> | P5   | SE <sup>2</sup> | P10  | SE   | P25  | SE   | P50  | SE   | P75  | SE   | P90  | SE   | P95   | SE   |
|--------------------|----------|------|-----------------|------|-----------------|------|------|------|------|------|------|------|------|------|------|-------|------|
| <b>Protein (g)</b> |          |      |                 |      |                 |      |      |      |      |      |      |      |      |      |      |       |      |
| <b>Male</b>        |          |      |                 |      |                 |      |      |      |      |      |      |      |      |      |      |       |      |
| 20-30              | 76       | 145  | 34.2            | 94   | 11.6            | 104  | 10.4 | 121  | 8.33 | 143  | 7.51 | 167  | 10.4 | 191  | 15.8 | 206   | 19.9 |
| 31-50              | 84       | 121  | 41.4            | 65   | 8.2             | 74   | 7.6  | 91   | 6.49 | 115  | 6.3  | 144  | 9.8  | 176  | 16.4 | 197   | 21.8 |
| 50+                | 56       | 107  | 28.9            | 68   | 8.1             | 74   | 7.4  | 86   | 6.31 | 102  | 6.17 | 122  | 9.7  | 145  | 16.5 | 160   | 22.2 |
| <b>Female</b>      |          |      |                 |      |                 |      |      |      |      |      |      |      |      |      |      |       |      |
| 20-30              | 111      | 80   | 13.3            | 59.9 | 5.3             | 63.9 | 4.6  | 71   | 3.63 | 79.5 | 3.21 | 88.8 | 4.3  | 97.8 | 6.4  | 103.6 | 7.9  |
| 31-50              | 91       | 77   | 19.7            | 46   | 5.9             | 52   | 5.2  | 63   | 4    | 76   | 3.47 | 89   | 4.7  | 102  | 6.9  | 111   | 8.6  |
| 50+                | 88       | 72   | 12.2            | 53.9 | 4.4             | 57.3 | 3.9  | 63.5 | 3.07 | 71.2 | 2.75 | 79.7 | 3.8  | 88.2 | 5.9  | 93.7  | 7.4  |
| <b>All</b>         | 506      | 98   | 35.5            | 51   | 2.6             | 58   | 2.5  | 72   | 2.16 | 92   | 2.16 | 117  | 3.4  | 145  | 5.9  | 164   | 7.9  |
| <b>Lipid (g)</b>   |          |      |                 |      |                 |      |      |      |      |      |      |      |      |      |      |       |      |
| <b>Male</b>        |          |      |                 |      |                 |      |      |      |      |      |      |      |      |      |      |       |      |
| 20-30              | 76       | 94   | 17.4            | 68   | 7.6             | 73   | 6.7  | 82   | 5.3  | 93   | 4.7  | 105  | 6.4  | 117  | 9.5  | 125   | 11.9 |
| 31-50              | 84       | 90   | 28.1            | 50   | 6.4             | 57   | 5.8  | 69   | 4.9  | 86   | 4.5  | 106  | 6.8  | 127  | 11.0 | 141   | 14.3 |
| 50+                | 56       | 67   | 13.2            | 47.4 | 6.5             | 51.1 | 5.8  | 57.9 | 4.5  | 66.2 | 4.0  | 75.4 | 5.6  | 84.5 | 8.6  | 90.4  | 10.8 |
| <b>Female</b>      |          |      |                 |      |                 |      |      |      |      |      |      |      |      |      |      |       |      |
| 20-30              | 111      | 65   | 8.6             | 51.3 | 4.4             | 54.1 | 3.8  | 59   | 2.9  | 64.7 | 2.5  | 70.6 | 3.2  | 76.1 | 4.5  | 79.5  | 5.5  |
| 31-50              | 91       | 61   | 16.0            | 38   | 4.5             | 42   | 4.1  | 50   | 3.3  | 60   | 3.0  | 71   | 4.3  | 82   | 6.6  | 90    | 8.4  |
| 50+                | 88       | 56   | 13.2            | 36.6 | 4.1             | 39.9 | 3.8  | 46.1 | 3.1  | 54.1 | 2.9  | 63.4 | 4.2  | 73   | 6.6  | 79.4  | 8.6  |
| <b>All</b>         | 506      | 72   | 22.3            | 40   | 2.1             | 46   | 1.9  | 56   | 1.6  | 69   | 1.6  | 85   | 2.3  | 101  | 3.7  | 112   | 4.9  |

<sup>1</sup>Standard Deviation<sup>2</sup>Standard Error

**Table S3. Distribution of means and percentiles of usual micronutrients intake according to BMI and physical activity. Brazil, 2016-2017.**

| Parameters                    | N   | Mean   | SD <sup>1</sup> | P5  | SE <sup>2</sup> | P10 | SE   | P25  | SE   | P50  | SE   | P75  | SE    | P90  | SE    | P95  | SE    |
|-------------------------------|-----|--------|-----------------|-----|-----------------|-----|------|------|------|------|------|------|-------|------|-------|------|-------|
| <b>Calcium (mg)</b>           |     |        |                 |     |                 |     |      |      |      |      |      |      |       |      |       |      |       |
| <b>BMI (kg/m<sup>2</sup>)</b> |     |        |                 |     |                 |     |      |      |      |      |      |      |       |      |       |      |       |
| < 25                          | 267 | 1290.4 | 379.0           | 751 | 47.9            | 844 | 43.9 | 1019 | 36.6 | 1247 | 34.3 | 1514 | 50.5  | 1793 | 80.8  | 1978 | 105.0 |
| 25 – 29.9                     | 166 | 1382.0 | 359.8           | 864 | 62.9            | 955 | 57.2 | 1125 | 47.1 | 1344 | 43.6 | 1597 | 63.1  | 1858 | 100.0 | 2031 | 130.0 |
| ≥ 30                          | 73  | 1249.6 | 445.9           | 606 | 102.0           | 718 | 91.6 | 929  | 73.6 | 1202 | 66.8 | 1520 | 101.0 | 1845 | 161.0 | 2057 | 206.0 |
| <b>PHYSICAL ACTIVITY</b>      |     |        |                 |     |                 |     |      |      |      |      |      |      |       |      |       |      |       |
| Yes                           | 387 | 1350.9 | 414.0           | 761 | 41.3            | 862 | 37.8 | 1054 | 31.2 | 1304 | 29.1 | 1596 | 43.0  | 1900 | 69.1  | 2102 | 89.5  |
| No                            | 119 | 1202.3 | 319.8           | 737 | 73.4            | 820 | 66.2 | 974  | 54.1 | 1170 | 50.0 | 1396 | 71.8  | 1626 | 112.0 | 1777 | 144.0 |
| <b>Phosphorous (mg)</b>       |     |        |                 |     |                 |     |      |      |      |      |      |      |       |      |       |      |       |
| <b>BMI (kg/m<sup>2</sup>)</b> |     |        |                 |     |                 |     |      |      |      |      |      |      |       |      |       |      |       |
| < 25                          | 267 | 1313.5 | 394.4           | 763 | 46.6            | 855 | 43.0 | 1031 | 36.2 | 1263 | 34.5 | 1541 | 51.7  | 1835 | 84.5  | 2035 | 111.0 |
| 25 – 29.9                     | 166 | 1453.0 | 478.0           | 814 | 62.4            | 915 | 58.1 | 1111 | 50.0 | 1380 | 49.2 | 1714 | 77.6  | 2083 | 132.0 | 2340 | 178.0 |
| ≥ 30                          | 73  | 1208.7 | 354.7           | 721 | 83.1            | 801 | 76.4 | 955  | 64.2 | 1161 | 61.4 | 1410 | 94.5  | 1678 | 158.0 | 1861 | 209.0 |
| <b>PHYSICAL ACTIVITY</b>      |     |        |                 |     |                 |     |      |      |      |      |      |      |       |      |       |      |       |
| Yes                           | 387 | 1393.3 | 469.3           | 756 | 40.1            | 858 | 37.4 | 1057 | 31.9 | 1326 | 30.9 | 1656 | 48.0  | 2014 | 80.8  | 2260 | 108.0 |
| No                            | 119 | 1196.3 | 277.6           | 801 | 68.0            | 870 | 61.8 | 999  | 51.4 | 1165 | 48.4 | 1360 | 70.4  | 1563 | 112.0 | 1699 | 146.0 |
| <b>Magnesium (mg)</b>         |     |        |                 |     |                 |     |      |      |      |      |      |      |       |      |       |      |       |
| <b>BMI (kg/m<sup>2</sup>)</b> |     |        |                 |     |                 |     |      |      |      |      |      |      |       |      |       |      |       |
| < 25                          | 267 | 497.9  | 123.5           | 315 | 16.7            | 348 | 15.0 | 410  | 12.0 | 487  | 10.7 | 574  | 15.1  | 661  | 23.5  | 717  | 29.9  |
| 25 – 29.9                     | 166 | 523.2  | 146.8           | 315 | 21.9            | 351 | 19.9 | 418  | 16.4 | 506  | 15.3 | 609  | 22.9  | 718  | 37.2  | 790  | 48.5  |
| ≥ 30                          | 73  | 438.2  | 120.6           | 260 | 30.3            | 292 | 27.1 | 352  | 21.4 | 427  | 18.9 | 512  | 27.5  | 598  | 43.3  | 653  | 55.3  |
| <b>PHYSICAL ACTIVITY</b>      |     |        |                 |     |                 |     |      |      |      |      |      |      |       |      |       |      |       |
| Yes                           | 387 | 519.9  | 137.2           | 319 | 14.5            | 355 | 13.1 | 422  | 10.5 | 507  | 9.5  | 603  | 13.8  | 702  | 21.7  | 766  | 27.8  |
| No                            | 119 | 426.9  | 100.5           | 279 | 21.2            | 306 | 19.0 | 355  | 15.3 | 417  | 13.9 | 488  | 19.9  | 560  | 31.1  | 607  | 39.8  |

Table S3. Continued.

| Parameters                    | N   | Mean   | SD <sup>1</sup> | P5  | SE <sup>2</sup> | P10   | SE   | P25  | SE   | P50  | SE   | P75    | SE    | P90  | SE    | P95  | SE    |
|-------------------------------|-----|--------|-----------------|-----|-----------------|-------|------|------|------|------|------|--------|-------|------|-------|------|-------|
| <b>Zinc (mg)</b>              |     |        |                 |     |                 |       |      |      |      |      |      |        |       |      |       |      |       |
| <b>BMI (kg/m<sup>2</sup>)</b> |     |        |                 |     |                 |       |      |      |      |      |      |        |       |      |       |      |       |
| < 25                          | 267 | 11.9   | 4.2             | 6.4 | 0.5             | 7.3   | 0.4  | 8.9  | 0.4  | 11.2 | 0.4  | 14.2   | 0.6   | 17.6 | 1.0   | 19.9 | 1.4   |
| 25 – 29.9                     | 166 | 13.6   | 5.9             | 6.7 | 0.6             | 7.6   | 0.6  | 9.5  | 0.5  | 12.4 | 0.6  | 16.4   | 1.0   | 21.2 | 1.9   | 24.8 | 2.6   |
| ≥ 30                          | 73  | 11.4   | 3.8             | 6.5 | 0.8             | 7.3   | 0.8  | 8.7  | 0.7  | 10.8 | 0.7  | 13.4   | 1.1   | 16.4 | 2.0   | 18.6 | 2.7   |
| <b>PHYSICAL ACTIVITY</b>      |     |        |                 |     |                 |       |      |      |      |      |      |        |       |      |       |      |       |
| Yes                           | 387 | 12.7   | 5.0             | 6.4 | 0.4             | 7.3   | 0.4  | 9.2  | 0.3  | 11.8 | 0.3  | 15.2   | 0.5   | 19.2 | 1.0   | 22.0 | 1.4   |
| No                            | 119 | 11.6   | 4.1             | 6.4 | 0.6             | 7.2   | 0.6  | 8.7  | 0.6  | 10.9 | 0.6  | 13.7   | 1.0   | 17.0 | 1.7   | 19.4 | 2.4   |
| <b>Copper (mg)</b>            |     |        |                 |     |                 |       |      |      |      |      |      |        |       |      |       |      |       |
| <b>BMI (kg/m<sup>2</sup>)</b> |     |        |                 |     |                 |       |      |      |      |      |      |        |       |      |       |      |       |
| < 25                          | 267 | 1319.8 | 546.8           | 760 | 47.7            | 843.0 | 43.0 | 995  | 35.5 | 1204 | 38.0 | 1497.0 | 69.1  | 1889 | 142.0 | 2231 | 239.0 |
| 25 – 29.9                     | 166 | 1338.7 | 368.6           | 826 | 69.5            | 912.0 | 64.2 | 1076 | 54.5 | 1291 | 52.5 | 1550.0 | 78.0  | 1825 | 127.0 | 2013 | 167.0 |
| ≥ 30                          | 73  | 1165.7 | 437.9           | 652 | 78.3            | 725.0 | 73.3 | 869  | 64.1 | 1075 | 66.9 | 1357.0 | 118.0 | 1711 | 234.0 | 1986 | 344.0 |
| <b>PHYSICAL ACTIVITY</b>      |     |        |                 |     |                 |       |      |      |      |      |      |        |       |      |       |      |       |
| Yes                           | 387 | 1317.8 | 406.2           | 768 | 40.9            | 857.0 | 38.1 | 1028 | 32.9 | 1259 | 32.4 | 1542.0 | 49.6  | 1853 | 83.1  | 2068 | 111.0 |
| No                            | 119 | 1299.4 | 751.0           | 696 | 64.6            | 763.0 | 59.6 | 897  | 54.4 | 1105 | 67.8 | 1450.0 | 146.0 | 1990 | 351.0 | 2502 | 610.0 |
| <b>Selenium (mcg)</b>         |     |        |                 |     |                 |       |      |      |      |      |      |        |       |      |       |      |       |
| <b>BMI (kg/m<sup>2</sup>)</b> |     |        |                 |     |                 |       |      |      |      |      |      |        |       |      |       |      |       |
| < 25                          | 267 | 138.1  | 55.1            | 69  | 5.6             | 80.0  | 5.2  | 100  | 4.5  | 128  | 4.6  | 165.0  | 7.6   | 208  | 14.2  | 241  | 20.0  |
| 25 – 29.9                     | 166 | 154.3  | 63.5            | 79  | 6.9             | 89.0  | 6.7  | 110  | 6.2  | 141  | 6.8  | 184.0  | 11.8  | 235  | 22.0  | 274  | 31.4  |
| ≥ 30                          | 73  | 122.2  | 31.7            | 82  | 9.1             | 88.0  | 8.5  | 100  | 7.4  | 117  | 7.5  | 138.0  | 12.3  | 163  | 21.9  | 181  | 30.1  |
| <b>PHYSICAL ACTIVITY</b>      |     |        |                 |     |                 |       |      |      |      |      |      |        |       |      |       |      |       |
| Yes                           | 387 | 149.5  | 62.5            | 76  | 4.9             | 87.0  | 4.5  | 107  | 3.8  | 136  | 4.1  | 177.0  | 7.4   | 228  | 14.1  | 267  | 20.3  |
| No                            | 119 | 116.8  | 35.8            | 70  | 6.5             | 77.0  | 6.1  | 91   | 5.4  | 111  | 5.5  | 136.0  | 8.8   | 164  | 15.2  | 184  | 20.7  |

Table S3. Continued.

| Parameters                    | N   | Mean | SD <sup>1</sup> | P5  | SE <sup>2</sup> | P10 | SE  | P25  | SE  | P50  | SE  | P75  | SE  | P90  | SE  | P95  | SE  |
|-------------------------------|-----|------|-----------------|-----|-----------------|-----|-----|------|-----|------|-----|------|-----|------|-----|------|-----|
| <b>Iron (mg)</b>              |     |      |                 |     |                 |     |     |      |     |      |     |      |     |      |     |      |     |
| <b>BMI (kg/m<sup>2</sup>)</b> |     |      |                 |     |                 |     |     |      |     |      |     |      |     |      |     |      |     |
| < 25                          | 267 | 13.3 | 3.8             | 8.1 | 0.5             | 9.0 | 0.4 | 10.7 | 0.3 | 12.8 | 0.3 | 15.3 | 0.5 | 18.2 | 0.9 | 20.2 | 1.2 |
| 25 – 29.9                     | 166 | 13.9 | 3.6             | 8.8 | 0.6             | 9.7 | 0.6 | 11.3 | 0.5 | 13.4 | 0.4 | 16.0 | 0.7 | 18.7 | 1.1 | 20.5 | 1.4 |
| ≥ 30                          | 73  | 11.5 | 2.9             | 7.7 | 0.7             | 8.3 | 0.6 | 9.4  | 0.5 | 11.0 | 0.5 | 12.9 | 0.8 | 15.2 | 1.5 | 16.8 | 2.0 |
| <b>PHYSICAL ACTIVITY</b>      |     |      |                 |     |                 |     |     |      |     |      |     |      |     |      |     |      |     |
| Yes                           | 387 | 13.4 | 3.8             | 8.2 | 0.4             | 9.1 | 0.4 | 10.8 | 0.3 | 12.9 | 0.3 | 15.5 | 0.4 | 18.4 | 0.7 | 20.3 | 0.9 |
| No                            | 119 | 12.6 | 3.5             | 8.0 | 0.6             | 8.7 | 0.6 | 10.1 | 0.5 | 12.1 | 0.5 | 14.5 | 0.8 | 17.3 | 1.4 | 19.2 | 1.9 |
| <b>Sodium (g)</b>             |     |      |                 |     |                 |     |     |      |     |      |     |      |     |      |     |      |     |
| <b>BMI (kg/m<sup>2</sup>)</b> |     |      |                 |     |                 |     |     |      |     |      |     |      |     |      |     |      |     |
| < 25                          | 267 | 3.3  | 0.9             | 2.0 | 0.1             | 2.3 | 0.1 | 2.7  | 0.1 | 3.2  | 0.1 | 3.8  | 0.1 | 4.5  | 0.2 | 4.9  | 0.3 |
| 25 – 29.9                     | 166 | 3.6  | 1.1             | 2.1 | 0.2             | 2.3 | 0.1 | 2.8  | 0.1 | 3.5  | 0.1 | 4.3  | 0.2 | 5.1  | 0.3 | 5.8  | 0.4 |
| ≥ 30                          | 73  | 3.0  | 0.8             | 1.9 | 0.2             | 2.1 | 0.2 | 2.4  | 0.1 | 2.9  | 0.1 | 3.4  | 0.2 | 4.0  | 0.3 | 4.4  | 0.4 |
| <b>PHYSICAL ACTIVITY</b>      |     |      |                 |     |                 |     |     |      |     |      |     |      |     |      |     |      |     |
| Yes                           | 387 | 3.4  | 1.1             | 2.0 | 0.1             | 2.2 | 0.1 | 2.7  | 0.1 | 3.3  | 0.1 | 4.1  | 0.1 | 4.9  | 0.2 | 5.4  | 0.3 |
| No                            | 119 | 3.1  | 0.9             | 2.0 | 0.2             | 2.2 | 0.2 | 2.5  | 0.1 | 3.0  | 0.1 | 3.6  | 0.2 | 4.3  | 0.3 | 4.7  | 0.4 |
| <b>Potassium (mg)</b>         |     |      |                 |     |                 |     |     |      |     |      |     |      |     |      |     |      |     |
| <b>BMI (kg/m<sup>2</sup>)</b> |     |      |                 |     |                 |     |     |      |     |      |     |      |     |      |     |      |     |
| < 25                          | 267 | 2.8  | 0.8             | 1.6 | 0.1             | 1.8 | 0.1 | 2.2  | 0.1 | 2.7  | 0.1 | 3.3  | 0.1 | 3.8  | 0.2 | 4.2  | 0.2 |
| 25 – 29.9                     | 166 | 3.0  | 0.9             | 1.8 | 0.1             | 2.0 | 0.1 | 2.4  | 0.1 | 2.9  | 0.1 | 3.5  | 0.1 | 4.1  | 0.3 | 4.6  | 0.4 |
| ≥ 30                          | 73  | 2.6  | 0.7             | 1.6 | 0.2             | 1.7 | 0.2 | 2.1  | 0.1 | 2.5  | 0.1 | 3.0  | 0.2 | 3.6  | 0.3 | 3.9  | 0.4 |
| <b>PHYSICAL ACTIVITY</b>      |     |      |                 |     |                 |     |     |      |     |      |     |      |     |      |     |      |     |
| Yes                           | 387 | 2.9  | 0.9             | 1.7 | 0.1             | 1.9 | 0.1 | 2.3  | 0.1 | 2.8  | 0.1 | 3.5  | 0.1 | 4.1  | 0.2 | 4.6  | 0.2 |
| No                            | 119 | 2.4  | 0.5             | 1.7 | 0.1             | 1.9 | 0.1 | 2.1  | 0.1 | 2.4  | 0.1 | 2.7  | 0.1 | 3.1  | 0.2 | 3.3  | 0.2 |

Table S3. Continued.

| Parameters                    | N   | Mean   | SD <sup>1</sup> | P5  | SE <sup>2</sup> | P10 | SE   | P25 | SE   | P50  | SE   | P75  | SE   | P90  | SE   | P95  | SE   |
|-------------------------------|-----|--------|-----------------|-----|-----------------|-----|------|-----|------|------|------|------|------|------|------|------|------|
| <b>Manganese (mg)</b>         |     |        |                 |     |                 |     |      |     |      |      |      |      |      |      |      |      |      |
| <b>BMI (kg/m<sup>2</sup>)</b> |     |        |                 |     |                 |     |      |     |      |      |      |      |      |      |      |      |      |
| < 25                          | 267 | 10.7   | 30.0            | 2.3 | 0.2             | 2.6 | 0.2  | 3.3 | 0.2  | 4.7  | 0.4  | 8.5  | 1.4  | 18.6 | 5.5  | 32.7 | 12.7 |
| 25 – 29.9                     | 166 | 13.1   | 58.2            | 1.8 | 0.2             | 2.1 | 0.2  | 2.8 | 0.2  | 4.1  | 0.4  | 7.8  | 1.6  | 20.0 | 7.7  | 39.3 | 19.9 |
| ≥ 30                          | 73  | 14.4   | 23.8            | 1.7 | 0.3             | 1.9 | 0.2  | 2.4 | 0.4  | 6.9  | 2.4  | 16.9 | 4.3  | 33.0 | 13.0 | 50.1 | 25.9 |
| <b>PHYSICAL ACTIVITY</b>      |     |        |                 |     |                 |     |      |     |      |      |      |      |      |      |      |      |      |
| Yes                           | 387 | 11.3   | 14.0            | 2.2 | 0.1             | 2.5 | 0.1  | 3.1 | 0.1  | 5.1  | 0.6  | 14.7 | 2.6  | 28.6 | 3.2  | 37.0 | 4.9  |
| No                            | 119 | 10.8   | 51.8            | 1.6 | 0.2             | 1.8 | 0.2  | 2.3 | 0.2  | 3.2  | 0.3  | 6.1  | 1.4  | 15.6 | 7.3  | 31.4 | 19.3 |
| <b>Folate (mcg)</b>           |     |        |                 |     |                 |     |      |     |      |      |      |      |      |      |      |      |      |
| <b>BMI (kg/m<sup>2</sup>)</b> |     |        |                 |     |                 |     |      |     |      |      |      |      |      |      |      |      |      |
| < 25                          | 267 | 352.8  | 116.6           | 192 | 13.3            | 219 | 12.3 | 269 | 10.6 | 337  | 10.3 | 419  | 15.5 | 510  | 25.6 | 567  | 33.8 |
| 25 – 29.9                     | 166 | 361.5  | 91.7            | 232 | 17.9            | 254 | 16.4 | 296 | 13.7 | 351  | 13.1 | 415  | 19.2 | 483  | 30.9 | 528  | 40.2 |
| ≥ 30                          | 73  | 317.5  | 71.8            | 218 | 23.4            | 234 | 21.3 | 266 | 17.8 | 308  | 17   | 358  | 25.7 | 412  | 42.2 | 449  | 55.7 |
| <b>PHYSICAL ACTIVITY</b>      |     |        |                 |     |                 |     |      |     |      |      |      |      |      |      |      |      |      |
| Yes                           | 387 | 356.8  | 113.5           | 201 | 10.9            | 226 | 10.1 | 275 | 8.6  | 341  | 8.31 | 421  | 12.6 | 507  | 20.8 | 565  | 27.5 |
| No                            | 119 | 329.7  | 70.7            | 228 | 21.7            | 246 | 19.6 | 279 | 16.2 | 322  | 15.2 | 372  | 21.8 | 423  | 34.3 | 457  | 44.4 |
| <b>Vitamin A (mcg)</b>        |     |        |                 |     |                 |     |      |     |      |      |      |      |      |      |      |      |      |
| <b>BMI (kg/m<sup>2</sup>)</b> |     |        |                 |     |                 |     |      |     |      |      |      |      |      |      |      |      |      |
| < 25                          | 267 | 1182.2 | 668.1           | 470 | 51.3            | 559 | 50.6 | 745 | 47.7 | 1025 | 53.5 | 1432 | 98.5 | 1974 | 204  | 2416 | 311  |
| 25 – 29.9                     | 166 | 1288.0 | 610.3           | 560 | 83              | 667 | 79   | 875 | 68.9 | 1167 | 71   | 1559 | 122  | 2043 | 238  | 2420 | 348  |
| ≥ 30                          | 73  | 1145.2 | 526.4           | 560 | 108             | 634 | 105  | 790 | 99.5 | 1025 | 111  | 1362 | 201  | 1793 | 399  | 2133 | 589  |
| <b>PHYSICAL ACTIVITY</b>      |     |        |                 |     |                 |     |      |     |      |      |      |      |      |      |      |      |      |
| Yes                           | 387 | 1268.3 | 654.1           | 529 | 47.8            | 627 | 46.5 | 828 | 42.9 | 1124 | 47   | 1540 | 83.7 | 2072 | 166  | 2491 | 245  |
| No                            | 119 | 1032.9 | 495.7           | 460 | 77.3            | 538 | 74.8 | 695 | 69   | 927  | 75.2 | 1248 | 132  | 1651 | 255  | 1963 | 371  |

Table S3. Continued.

| Parameters                    | N   | Mean  | SD <sup>1</sup> | P5  | SE <sup>2</sup> | P10 | SE   | P25 | SE   | P50 | SE   | P75 | SE   | P90  | SE   | P95  | SE   |
|-------------------------------|-----|-------|-----------------|-----|-----------------|-----|------|-----|------|-----|------|-----|------|------|------|------|------|
| <b>Vitamin C (mg)</b>         |     |       |                 |     |                 |     |      |     |      |     |      |     |      |      |      |      |      |
| <b>BMI (kg/m<sup>2</sup>)</b> |     |       |                 |     |                 |     |      |     |      |     |      |     |      |      |      |      |      |
| < 25                          | 267 | 276.3 | 718.2           | 38  | 5.9             | 49  | 6.3  | 74  | 7.3  | 126 | 11.9 | 242 | 37.3 | 517  | 135  | 878  | 299  |
| 25 – 29.9                     | 166 | 205.3 | 276.3           | 41  | 7.5             | 51  | 7.9  | 76  | 9.3  | 126 | 14.7 | 227 | 38.2 | 416  | 107  | 614  | 199  |
| ≥ 30                          | 73  | 474.1 | 906.0           | 39  | 11.7            | 50  | 14.3 | 89  | 23.8 | 202 | 53.0 | 494 | 164  | 1084 | 490  | 1735 | 939  |
| <b>PHYSICAL ACTIVITY</b>      |     |       |                 |     |                 |     |      |     |      |     |      |     |      |      |      |      |      |
| Yes                           | 387 | 201.7 | 252.9           | 43  | 5.2             | 54  | 5.7  | 82  | 6.5  | 132 | 9.1  | 226 | 21.9 | 396  | 62.4 | 576  | 116  |
| No                            | 119 | 546.0 | 2267.2          | 30  | 8.0             | 40  | 9.0  | 66  | 12.8 | 137 | 27.9 | 350 | 113  | 978  | 503  | 1899 | 1220 |
| <b>Vitamin D (mcg)</b>        |     |       |                 |     |                 |     |      |     |      |     |      |     |      |      |      |      |      |
| <b>BMI (kg/m<sup>2</sup>)</b> |     |       |                 |     |                 |     |      |     |      |     |      |     |      |      |      |      |      |
| < 25                          | 267 | 4.6   | 3.0             | 1.4 | 0.2             | 1.8 | 0.2  | 2.7 | 0.2  | 3.9 | 0.2  | 5.8 | 0.4  | 8.2  | 0.9  | 10.1 | 1.4  |
| 25 – 29.9                     | 166 | 5.0   | 2.4             | 1.9 | 0.3             | 2.3 | 0.3  | 3.3 | 0.3  | 5.9 | 0.4  | 6.3 | 0.5  | 8.2  | 0.8  | 9.5  | 1.1  |
| ≥ 30                          | 73  | 4.4   | 1.9             | 1.9 | 0.5             | 2.3 | 0.5  | 3   | 0.4  | 4.1 | 0.4  | 5.4 | 0.7  | 6.9  | 1.2  | 7.9  | 1.6  |
| <b>PHYSICAL ACTIVITY</b>      |     |       |                 |     |                 |     |      |     |      |     |      |     |      |      |      |      |      |
| Yes                           | 387 | 5.0   | 2.9             | 1.7 | 0.2             | 2.1 | 0.2  | 3   | 0.2  | 5.7 | 0.3  | 6.2 | 0.4  | 8.6  | 0.7  | 10.3 | 1.0  |
| No                            | 119 | 4.0   | 1.5             | 1.9 | 0.4             | 2.3 | 0.4  | 2.9 | 0.3  | 4.6 | 0.4  | 4.8 | 0.5  | 5.9  | 0.7  | 6.6  | 0.9  |
| <b>Vitamin E (mg)</b>         |     |       |                 |     |                 |     |      |     |      |     |      |     |      |      |      |      |      |
| <b>BMI (kg/m<sup>2</sup>)</b> |     |       |                 |     |                 |     |      |     |      |     |      |     |      |      |      |      |      |
| < 25                          | 267 | 7.2   | 2.5             | 3.9 | 0.3             | 4.4 | 0.3  | 5.4 | 0.2  | 6.8 | 0.2  | 8.6 | 0.4  | 10.5 | 0.6  | 11.8 | 0.9  |
| 25 – 29.9                     | 166 | 7.5   | 2.6             | 4.1 | 0.4             | 4.6 | 0.4  | 5.7 | 0.3  | 7   | 0.3  | 8.8 | 0.5  | 10.8 | 0.9  | 12.4 | 1.3  |
| ≥ 30                          | 73  | 6.2   | 2.5             | 3.4 | 0.4             | 3.7 | 0.4  | 4.5 | 0.4  | 5.6 | 0.5  | 7.3 | 0.8  | 9.4  | 1.6  | 11   | 2.3  |
| <b>PHYSICAL ACTIVITY</b>      |     |       |                 |     |                 |     |      |     |      |     |      |     |      |      |      |      |      |
| Yes                           | 387 | 7.5   | 2.8             | 4   | 0.2             | 4.5 | 0.2  | 5.5 | 0.2  | 7   | 0.2  | 8.8 | 0.3  | 11   | 0.6  | 12.7 | 0.9  |
| No                            | 119 | 6.1   | 1.9             | 3.6 | 0.4             | 4   | 0.4  | 4.7 | 0.3  | 5.8 | 0.3  | 7.1 | 0.5  | 8.6  | 0.9  | 9.7  | 1.1  |

Table S3. Continued.

| Parameters                    | N   | Mean  | SD <sup>1</sup> | P5  | SE <sup>2</sup> | P10 | SE   | P25 | SE   | P50 | SE  | P75 | SE   | P90 | SE   | P95 | SE   |
|-------------------------------|-----|-------|-----------------|-----|-----------------|-----|------|-----|------|-----|-----|-----|------|-----|------|-----|------|
| <b>Vitamin K (mcg)</b>        |     |       |                 |     |                 |     |      |     |      |     |     |     |      |     |      |     |      |
| <b>BMI (kg/m<sup>2</sup>)</b> |     |       |                 |     |                 |     |      |     |      |     |     |     |      |     |      |     |      |
| < 25                          | 267 | 132.4 | 52.9            | 66  | 7.0             | 75  | 6.71 | 95  | 6.16 | 123 | 6.5 | 159 | 10.5 | 201 | 18.3 | 232 | 25.2 |
| 25 – 29.9                     | 166 | 128.1 | 70.5            | 52  | 6.9             | 62  | 6.7  | 82  | 6.21 | 112 | 6.9 | 155 | 12.6 | 212 | 26.2 | 258 | 39.8 |
| ≥ 30                          | 73  | 84.9  | 24.1            | 52  | 9.0             | 57  | 8.35 | 68  | 7.09 | 82  | 6.8 | 99  | 10.3 | 117 | 17.1 | 129 | 22.6 |
| <b>PHYSICAL ACTIVITY</b>      |     |       |                 |     |                 |     |      |     |      |     |     |     |      |     |      |     |      |
| Yes                           | 387 | 130.6 | 51.3            | 66  | 5.6             | 75  | 5.33 | 94  | 4.87 | 121 | 5.1 | 157 | 8.24 | 197 | 14.4 | 227 | 19.8 |
| No                            | 119 | 93.4  | 45.1            | 40  | 6.0             | 47  | 5.93 | 62  | 5.63 | 84  | 6.2 | 114 | 10.5 | 151 | 19.3 | 179 | 27.3 |
| <b>Vitamin B1 (mg)</b>        |     |       |                 |     |                 |     |      |     |      |     |     |     |      |     |      |     |      |
| <b>BMI (kg/m<sup>2</sup>)</b> |     |       |                 |     |                 |     |      |     |      |     |     |     |      |     |      |     |      |
| < 25                          | 267 | 1.5   | 0.5             | 0.9 | 0.1             | 1.0 | 0.1  | 1.2 | 0.0  | 1.5 | 0.0 | 1.8 | 0.1  | 2.2 | 0.1  | 2.4 | 0.1  |
| 25 – 29.9                     | 166 | 1.6   | 0.4             | 1.0 | 0.1             | 1.1 | 0.1  | 1.3 | 0.1  | 1.5 | 0.1 | 1.9 | 0.1  | 2.2 | 0.1  | 2.4 | 0.2  |
| ≥ 30                          | 73  | 1.4   | 0.4             | 0.9 | 0.1             | 1.0 | 0.1  | 1.1 | 0.1  | 1.3 | 0.1 | 1.6 | 0.1  | 1.9 | 0.2  | 2.1 | 0.2  |
| <b>PHYSICAL ACTIVITY</b>      |     |       |                 |     |                 |     |      |     |      |     |     |     |      |     |      |     |      |
| Yes                           | 387 | 1.6   | 0.5             | 0.9 | 0.0             | 1.0 | 0.0  | 1.2 | 0.0  | 1.5 | 0.0 | 1.8 | 0.1  | 2.2 | 0.1  | 2.5 | 0.1  |
| No                            | 119 | 1.5   | 0.4             | 1.0 | 0.1             | 1.0 | 0.1  | 1.2 | 0.1  | 1.4 | 0.1 | 1.7 | 0.1  | 2.0 | 0.2  | 2.2 | 0.2  |
| <b>Vitamin B2 (mg)</b>        |     |       |                 |     |                 |     |      |     |      |     |     |     |      |     |      |     |      |
| <b>BMI (kg/m<sup>2</sup>)</b> |     |       |                 |     |                 |     |      |     |      |     |     |     |      |     |      |     |      |
| < 25                          | 267 | 1.6   | 0.4             | 1.0 | 0.1             | 1.1 | 0.1  | 1.3 | 0.0  | 1.6 | 0.0 | 1.9 | 0.1  | 2.2 | 0.1  | 2.4 | 0.1  |
| 25 – 29.9                     | 166 | 1.8   | 0.4             | 1.2 | 0.1             | 1.3 | 0.1  | 1.5 | 0.1  | 1.8 | 0.1 | 2.1 | 0.1  | 2.4 | 0.1  | 2.6 | 0.2  |
| ≥ 30                          | 73  | 1.5   | 0.4             | 0.9 | 0.1             | 1.0 | 0.1  | 1.2 | 0.1  | 1.5 | 0.1 | 1.8 | 0.1  | 2.1 | 0.2  | 2.4 | 0.3  |
| <b>PHYSICAL ACTIVITY</b>      |     |       |                 |     |                 |     |      |     |      |     |     |     |      |     |      |     |      |
| Yes                           | 387 | 1.7   | 0.5             | 1.0 | 0.0             | 1.1 | 0.0  | 1.4 | 0.0  | 1.7 | 0.0 | 2.0 | 0.1  | 2.4 | 0.1  | 2.6 | 0.1  |
| No                            | 119 | 1.6   | 0.3             | 1.2 | 0.1             | 1.3 | 0.1  | 1.4 | 0.1  | 1.6 | 0.1 | 1.8 | 0.1  | 1.9 | 0.1  | 2.1 | 0.2  |



Table S3. Continued.

| Parameters                    | N   | Mean | SD <sup>1</sup> | P5   | SE <sup>2</sup> | P10  | SE  | P25  | SE  | P50  | SE  | P75  | SE  | P90  | SE  | P95  | SE  |
|-------------------------------|-----|------|-----------------|------|-----------------|------|-----|------|-----|------|-----|------|-----|------|-----|------|-----|
| <b>Vitamin B3 (mg)</b>        |     |      |                 |      |                 |      |     |      |     |      |     |      |     |      |     |      |     |
| <b>BMI (kg/m<sup>2</sup>)</b> |     |      |                 |      |                 |      |     |      |     |      |     |      |     |      |     |      |     |
| < 25                          | 267 | 24.6 | 8.8             | 13.0 | 1.0             | 14.8 | 0.9 | 18.3 | 0.8 | 23.2 | 0.8 | 29.3 | 1.3 | 36.2 | 2.2 | 41.0 | 3.0 |
| 25 – 29.9                     | 166 | 26.8 | 7.6             | 16.4 | 1.5             | 18.1 | 1.4 | 21.4 | 1.2 | 25.7 | 1.2 | 31.0 | 1.8 | 36.9 | 3.0 | 40.9 | 4.0 |
| ≥ 30                          | 73  | 23.3 | 6.0             | 15.2 | 1.9             | 16.5 | 1.8 | 19.0 | 1.5 | 22.5 | 1.5 | 26.6 | 2.3 | 31.2 | 3.8 | 34.4 | 5.1 |
| <b>PHYSICAL ACTIVITY</b>      |     |      |                 |      |                 |      |     |      |     |      |     |      |     |      |     |      |     |
| Yes                           | 387 | 25.8 | 9.5             | 13.7 | 0.8             | 15.5 | 0.8 | 19.1 | 0.7 | 24.2 | 0.7 | 30.8 | 1.2 | 38.2 | 2.0 | 43.5 | 2.8 |
| No                            | 119 | 23.0 | 6.0             | 14.6 | 1.6             | 16.0 | 1.5 | 18.7 | 1.3 | 22.2 | 1.2 | 26.4 | 1.8 | 30.9 | 2.9 | 33.9 | 3.8 |
| <b>Vitamin B5 (mg)</b>        |     |      |                 |      |                 |      |     |      |     |      |     |      |     |      |     |      |     |
| <b>BMI (kg/m<sup>2</sup>)</b> |     |      |                 |      |                 |      |     |      |     |      |     |      |     |      |     |      |     |
| < 25                          | 267 | 5.4  | 1.4             | 3.5  | 0.2             | 3.8  | 0.2 | 4.4  | 0.2 | 5.3  | 0.1 | 6.3  | 0.2 | 7.3  | 0.3 | 8.1  | 0.5 |
| 25 – 29.9                     | 166 | 5.7  | 1.5             | 3.6  | 0.2             | 4.0  | 0.2 | 4.7  | 0.2 | 5.5  | 0.2 | 6.6  | 0.3 | 7.8  | 0.5 | 8.6  | 0.6 |
| ≥ 30                          | 73  | 5.0  | 1.3             | 3.3  | 0.3             | 3.6  | 0.3 | 4.1  | 0.2 | 4.8  | 0.2 | 5.7  | 0.4 | 6.7  | 0.7 | 7.5  | 1.0 |
| <b>PHYSICAL ACTIVITY</b>      |     |      |                 |      |                 |      |     |      |     |      |     |      |     |      |     |      |     |
| Yes                           | 387 | 5.6  | 1.7             | 3.4  | 0.2             | 3.7  | 0.1 | 4.4  | 0.1 | 5.4  | 0.1 | 6.6  | 0.2 | 7.9  | 0.3 | 8.7  | 0.4 |
| No                            | 119 | 4.9  | 0.6             | 4.0  | 0.3             | 4.2  | 0.3 | 4.5  | 0.2 | 4.9  | 0.2 | 5.3  | 0.3 | 5.7  | 0.4 | 5.9  | 0.5 |
| <b>Vitamin B6 (mg)</b>        |     |      |                 |      |                 |      |     |      |     |      |     |      |     |      |     |      |     |
| <b>BMI (kg/m<sup>2</sup>)</b> |     |      |                 |      |                 |      |     |      |     |      |     |      |     |      |     |      |     |
| < 25                          | 267 | 2.0  | 0.6             | 1.1  | 0.1             | 1.3  | 0.1 | 1.5  | 0.1 | 1.9  | 0.1 | 2.3  | 0.1 | 2.8  | 0.2 | 3.2  | 0.2 |
| 25 – 29.9                     | 166 | 2.2  | 0.7             | 1.3  | 0.1             | 1.4  | 0.1 | 1.7  | 0.1 | 2.1  | 0.1 | 2.5  | 0.1 | 3.1  | 0.2 | 3.4  | 0.3 |
| ≥ 30                          | 73  | 1.8  | 0.5             | 1.1  | 0.1             | 1.2  | 0.1 | 1.5  | 0.1 | 1.8  | 0.1 | 2.1  | 0.2 | 2.5  | 0.3 | 2.8  | 0.4 |
| <b>PHYSICAL ACTIVITY</b>      |     |      |                 |      |                 |      |     |      |     |      |     |      |     |      |     |      |     |
| Yes                           | 387 | 2.1  | 0.7             | 1.2  | 0.1             | 1.3  | 0.1 | 1.6  | 0.1 | 2.0  | 0.1 | 2.5  | 0.1 | 3.0  | 0.1 | 3.4  | 0.2 |
| No                            | 119 | 1.8  | 0.5             | 1.1  | 0.1             | 1.2  | 0.1 | 1.4  | 0.1 | 1.7  | 0.1 | 2.1  | 0.1 | 2.5  | 0.2 | 2.8  | 0.3 |

**Table S3. Continued.**

| <b>Parameters</b>             | <b>N</b> | <b>Mean</b> | <b>SD<sup>1</sup></b> | <b>P5</b> | <b>SE<sup>2</sup></b> | <b>P10</b> | <b>SE</b> | <b>P25</b> | <b>SE</b> | <b>P50</b> | <b>SE</b> | <b>P75</b> | <b>SE</b> | <b>P90</b> | <b>SE</b> | <b>P95</b> | <b>SE</b> |
|-------------------------------|----------|-------------|-----------------------|-----------|-----------------------|------------|-----------|------------|-----------|------------|-----------|------------|-----------|------------|-----------|------------|-----------|
| <b>Vitamin B12 (mcg)</b>      |          |             |                       |           |                       |            |           |            |           |            |           |            |           |            |           |            |           |
| <b>BMI (kg/m<sup>2</sup>)</b> |          |             |                       |           |                       |            |           |            |           |            |           |            |           |            |           |            |           |
| < 25                          | 267      | 4.7         | 3.9                   | 1.9       | 0.2                   | 2.2        | 0.2       | 2.9        | 0.2       | 3.8        | 0.2       | 5.2        | 0.4       | 7.8        | 1.1       | 10.6       | 2.0       |
| 25 – 29.9                     | 166      | 5.2         | 2.5                   | 2.2       | 0.3                   | 2.7        | 0.3       | 3.5        | 0.2       | 4.7        | 0.3       | 6.4        | 0.5       | 8.3        | 0.9       | 9.8        | 1.3       |
| ≥ 30                          | 73       | 5.0         | 2.6                   | 2.2       | 0.5                   | 2.6        | 0.5       | 3.3        | 0.4       | 4.4        | 0.4       | 5.9        | 0.8       | 8.0        | 1.8       | 9.8        | 2.8       |
| <b>PHYSICAL ACTIVITY</b>      |          |             |                       |           |                       |            |           |            |           |            |           |            |           |            |           |            |           |
| Yes                           | 387      | 4.7         | 2.5                   | 1.9       | 0.2                   | 2.3        | 0.1       | 3.0        | 0.1       | 4.1        | 0.2       | 5.7        | 0.3       | 7.7        | 0.5       | 9.3        | 0.8       |
| No                            | 119      | 5.8         | 4.4                   | 2.2       | 0.3                   | 2.5        | 0.3       | 3.1        | 0.4       | 4.4        | 0.5       | 6.8        | 1.2       | 10.5       | 2.8       | 13.8       | 4.4       |

<sup>1</sup>Standard Deviation

<sup>2</sup>Standard Error

**Table S4. Distribution of means and percentiles of usual intake of energy and macronutrients according to BMI and physical activity. Brazil, 2016-2017.**

| Parameters                    | N               | Mean | SD <sup>1</sup> | P5   | SE <sup>2</sup> | P10  | SE    | P25  | SE   | P50  | SE   | P75  | SE    | P90  | SE    | P95  | SE    |
|-------------------------------|-----------------|------|-----------------|------|-----------------|------|-------|------|------|------|------|------|-------|------|-------|------|-------|
| <b>Energy (kcal)</b>          |                 |      |                 |      |                 |      |       |      |      |      |      |      |       |      |       |      |       |
| <b>BMI (kg/m<sup>2</sup>)</b> |                 |      |                 |      |                 |      |       |      |      |      |      |      |       |      |       |      |       |
| < 25                          | 267             | 1944 | 554.4           | 1154 | 66.8            | 1290 | 60.8  | 1548 | 50.1 | 1882 | 46.4 | 2272 | 68.7  | 2679 | 111.0 | 2950 | 144.0 |
| 25 – 29.9                     | 166             | 2120 | 555.0           | 1333 | 89.4            | 1469 | 81.5  | 1724 | 67.5 | 2055 | 63.2 | 2445 | 93.6  | 2854 | 151.0 | 3128 | 198.0 |
| ≥ 30                          | 73              | 1809 | 366.5           | 1274 | 121.0           | 1371 | 108.0 | 1549 | 87.2 | 1774 | 79.5 | 2031 | 114.0 | 2293 | 180.0 | 2466 | 232.0 |
| <b>PHYSICAL</b>               | <b>ACTIVITY</b> |      |                 |      |                 |      |       |      |      |      |      |      |       |      |       |      |       |
| Yes                           | 387             | 2012 | 568.7           | 1208 | 55.5            | 1345 | 50.6  | 1605 | 41.9 | 1944 | 39.2 | 2345 | 58.6  | 2765 | 95.2  | 3047 | 124.0 |
| No                            | 119             | 1895 | 471.8           | 1221 | 98.9            | 1339 | 90.2  | 1559 | 74.7 | 1843 | 69.7 | 2174 | 101.0 | 2519 | 162.0 | 2749 | 211.0 |
| <b>Carbohydrate (g)</b>       |                 |      |                 |      |                 |      |       |      |      |      |      |      |       |      |       |      |       |
| <b>BMI (kg/m<sup>2</sup>)</b> |                 |      |                 |      |                 |      |       |      |      |      |      |      |       |      |       |      |       |
| < 25                          | 267             | 231  | 72.2            | 129  | 8.8             | 146  | 8.0   | 179  | 6.7  | 223  | 6.3  | 274  | 9.3   | 327  | 15.0  | 362  | 19.5  |
| 25 – 29.9                     | 166             | 241  | 70.9            | 139  | 13.1            | 158  | 11.7  | 191  | 9.2  | 233  | 8.4  | 281  | 12.4  | 333  | 20.8  | 368  | 27.7  |
| ≥ 30                          | 73              | 217  | 58.0            | 131  | 16.6            | 147  | 14.9  | 176  | 12.0 | 212  | 10.8 | 253  | 15.3  | 294  | 23.9  | 320  | 30.4  |
| <b>PHYSICAL</b>               | <b>ACTIVITY</b> |      |                 |      |                 |      |       |      |      |      |      |      |       |      |       |      |       |
| Yes                           | 387             | 234  | 71.8            | 131  | 7.4             | 149  | 6.8   | 183  | 5.6  | 226  | 5.2  | 277  | 7.6   | 330  | 12.1  | 364  | 15.7  |
| No                            | 119             | 226  | 66.0            | 132  | 14.8            | 150  | 13.2  | 181  | 10.3 | 219  | 9.3  | 264  | 13.9  | 312  | 23.6  | 345  | 31.6  |

**Table S4. Continued.**

| <b>Parameters</b>             | <b>N</b>        | <b>Mean</b> | <b>SD<sup>1</sup></b> | <b>P5</b> | <b>SE<sup>2</sup></b> | <b>P10</b> | <b>SE</b> | <b>P25</b> | <b>SE</b> | <b>P50</b> | <b>SE</b> | <b>P75</b> | <b>SE</b> | <b>P90</b> | <b>SE</b> | <b>P95</b> | <b>SE</b> |
|-------------------------------|-----------------|-------------|-----------------------|-----------|-----------------------|------------|-----------|------------|-----------|------------|-----------|------------|-----------|------------|-----------|------------|-----------|
| <b>Protein (g)</b>            |                 |             |                       |           |                       |            |           |            |           |            |           |            |           |            |           |            |           |
| <b>BMI (kg/m<sup>2</sup>)</b> |                 |             |                       |           |                       |            |           |            |           |            |           |            |           |            |           |            |           |
| < 25                          | 267             | 95          | 33.7                  | 49        | 3.6                   | 56         | 3.4       | 71         | 2.9       | 90         | 2.9       | 113        | 4.4       | 139        | 7.4       | 157        | 9.9       |
| 25 – 29.9                     | 166             | 107         | 36.3                  | 58        | 5.0                   | 66         | 4.7       | 81         | 4.1       | 101        | 4.1       | 127        | 6.4       | 155        | 10.9      | 174        | 14.6      |
| ≥ 30                          | 73              | 89          | 27.8                  | 54        | 5.8                   | 59         | 5.4       | 69         | 4.6       | 83         | 4.7       | 102        | 7.9       | 124        | 14.7      | 141        | 20.9      |
| <b>PHYSICAL</b>               | <b>ACTIVITY</b> |             |                       |           |                       |            |           |            |           |            |           |            |           |            |           |            |           |
| Yes                           | 387             | 101         | 38.2                  | 52        | 3.2                   | 60         | 2.9       | 75         | 2.5       | 95         | 2.4       | 121        | 4.0       | 151        | 7.3       | 172        | 10.2      |
| No                            | 119             | 86          | 25.0                  | 52        | 5.0                   | 58         | 4.7       | 68         | 4.0       | 83         | 4.0       | 100        | 6.0       | 119        | 10.0      | 132        | 13.4      |
| <b>Lipid (g)</b>              |                 |             |                       |           |                       |            |           |            |           |            |           |            |           |            |           |            |           |
| <b>BMI (kg/m<sup>2</sup>)</b> |                 |             |                       |           |                       |            |           |            |           |            |           |            |           |            |           |            |           |
| < 25                          | 267             | 70          | 20.7                  | 40        | 2.9                   | 45         | 2.6       | 55         | 2.2       | 68         | 2.1       | 82         | 3.0       | 97         | 4.7       | 107        | 6.0       |
| 25 – 29.9                     | 166             | 78          | 24.6                  | 44        | 3.9                   | 50         | 3.6       | 60         | 3.1       | 75         | 3.0       | 92         | 4.4       | 111        | 7.3       | 123        | 9.6       |
| ≥ 30                          | 73              | 62          | 6.9                   | 51        | 6.3                   | 53         | 5.4       | 57         | 4.1       | 62         | 3.4       | 66         | 4.6       | 71         | 7.0       | 74         | 8.7       |
| <b>PHYSICAL</b>               | <b>ACTIVITY</b> |             |                       |           |                       |            |           |            |           |            |           |            |           |            |           |            |           |
| Yes                           | 387             | 73          | 22.0                  | 41        | 2.5                   | 47         | 2.3       | 57         | 1.9       | 70         | 1.8       | 86         | 2.6       | 102        | 4.2       | 113        | 5.4       |
| No                            | 119             | 68          | 20.2                  | 40        | 4.0                   | 45         | 3.7       | 54         | 3.2       | 65         | 3.1       | 80         | 4.6       | 95         | 7.5       | 105        | 9.8       |

<sup>1</sup>Standard Deviation

<sup>2</sup>Standard Error

**Table S5. Distribution of mean and percentiles of usual grams of food and beverages intake according to gender, age, BMI and physical activity. Brazil, 2016-2017.**

| <b>Parameters</b>             | <b>N</b> | <b>Mean</b> | <b>SD<sup>1</sup></b> | <b>P5</b> | <b>SE<sup>2</sup></b> | <b>P10</b> | <b>SE</b> | <b>P25</b> | <b>SE</b> | <b>P50</b> | <b>SE</b> | <b>P75</b> | <b>SE</b> | <b>P90</b> | <b>SE</b> | <b>P95</b> | <b>SE</b> |
|-------------------------------|----------|-------------|-----------------------|-----------|-----------------------|------------|-----------|------------|-----------|------------|-----------|------------|-----------|------------|-----------|------------|-----------|
| <b>Male</b>                   |          |             |                       |           |                       |            |           |            |           |            |           |            |           |            |           |            |           |
| 20-30                         | 76       | 4075.5      | 822.89                | 2824      | 257                   | 3064       | 226       | 3495       | 177       | 4020       | 155       | 4595       | 213       | 5159       | 322       | 5517       | 403       |
| 31-50                         | 84       | 3754.4      | 811.65                | 2562      | 196                   | 2779       | 174       | 3178       | 138       | 3679       | 124       | 4249       | 179       | 4828       | 284       | 5205       | 364       |
| 50+                           | 56       | 3662.1      | 876.06                | 2358      | 264                   | 2600       | 231       | 3039       | 179       | 3588       | 158       | 4207       | 230       | 4825       | 359       | 5220       | 453       |
| <b>Female</b>                 |          |             |                       |           |                       |            |           |            |           |            |           |            |           |            |           |            |           |
| 20-30                         | 111      | 2987        | 642.5                 | 1997      | 161                   | 2190       | 141       | 2535       | 109       | 2950       | 94.2      | 3399       | 128       | 3831       | 190       | 4103       | 236       |
| 31-50                         | 91       | 3148.7      | 738.91                | 2040      | 194                   | 2247       | 172       | 2625       | 136       | 3091       | 121       | 3610       | 169       | 4125       | 258       | 4454       | 326       |
| 50+                           | 88       | 2933.5      | 590.48                | 1987      | 166                   | 2183       | 142       | 2525       | 105       | 2919       | 83.9      | 3326       | 111       | 3700       | 162       | 3928       | 198       |
| <b>BMI (kg/m<sup>2</sup>)</b> |          |             |                       |           |                       |            |           |            |           |            |           |            |           |            |           |            |           |
| < 25                          | 267      | 3296.8      | 867.95                | 2027      | 109                   | 2255       | 98.5      | 2678       | 79.1      | 3213       | 71.1      | 3825       | 103       | 4446       | 163       | 4852       | 210       |
| 25 – 29.9                     | 166      | 3556.3      | 816.77                | 2343      | 150                   | 2567       | 133       | 2976       | 106       | 3487       | 95.1      | 4061       | 134       | 4635       | 208       | 5007       | 264       |
| ≥ 30                          | 73       | 3244        | 768.21                | 2100      | 253                   | 2349       | 208       | 2747       | 137       | 3180       | 111       | 3665       | 171       | 4211       | 313       | 4607       | 428       |
| <b>PHYSICAL ACTIVITY</b>      |          |             |                       |           |                       |            |           |            |           |            |           |            |           |            |           |            |           |
| Yes                           | 387      | 3466.8      | 878.01                | 2168      | 94.6                  | 2405       | 84.7      | 2842       | 67.5      | 3389       | 60.2      | 4007       | 86.1      | 4628       | 135       | 5031       | 172       |
| No                            | 119      | 3067.1      | 736.79                | 1998      | 150                   | 2189       | 135       | 2542       | 110       | 2992       | 101       | 3510       | 146       | 4042       | 231       | 4392       | 297       |

<sup>1</sup>Standard Deviation

<sup>2</sup>Standard Error
